# Supplementary material
Source: MDPI journal article supplement (https://www.mdpi.com/2072-4292/16/10/1750)
Supplement: s1 [file s1 › Supplementary_Material_rsb.pdf]

Supplementary Material

**Results of hyperbolic-logarithmic and logarithmic approximation of spiral signatures on SAR images**

| File sub # | TC Name  | Page |
|------------|----------|------|
|            | Content  | 1    |
| 1          | Alma     | 2    |
| 2          | Dean     | 4    |
| 3          | Ewiniar  | 6    |
| 4          | Flossie  | 8    |
| 5          | Franklin | 10   |
| 6          | Javier   | 12   |
| 7          | Jova     | 14   |
| 8          | Katrina  | 16   |
| 9          | Kenneth  | 18   |
| 10         | Kirogi   | 20   |
| 11         | Mawar    | 22   |
| 12         | Meari    | 24   |
| 13         | Xangsane | 26   |
| 14         | Yagi     | 28   |

## Supplemental file 1\_Alma

SAR image index: 20020530014925

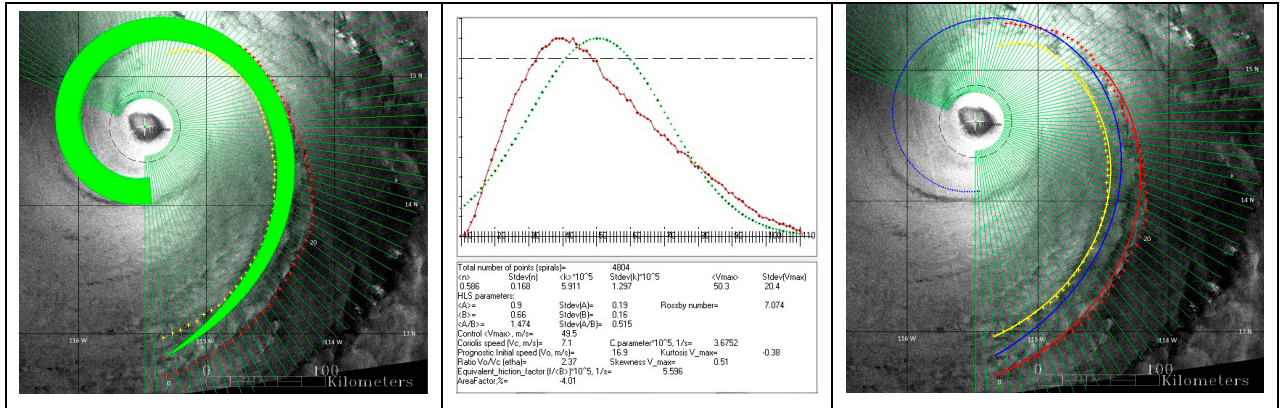

Fig. 1S1. HLS-approximation of the spiral band on SAR image of TC Alma at  $R_m=30$  km; left panel: family of signature spirals; center panel: histogram of distribution of maximum speeds; right panel: mean HLS of the spiral band (blue curve), trailing (yellow curve) and leading (red curve) edges approximated by a logarithmic spiral; approximated interval 0-43 points

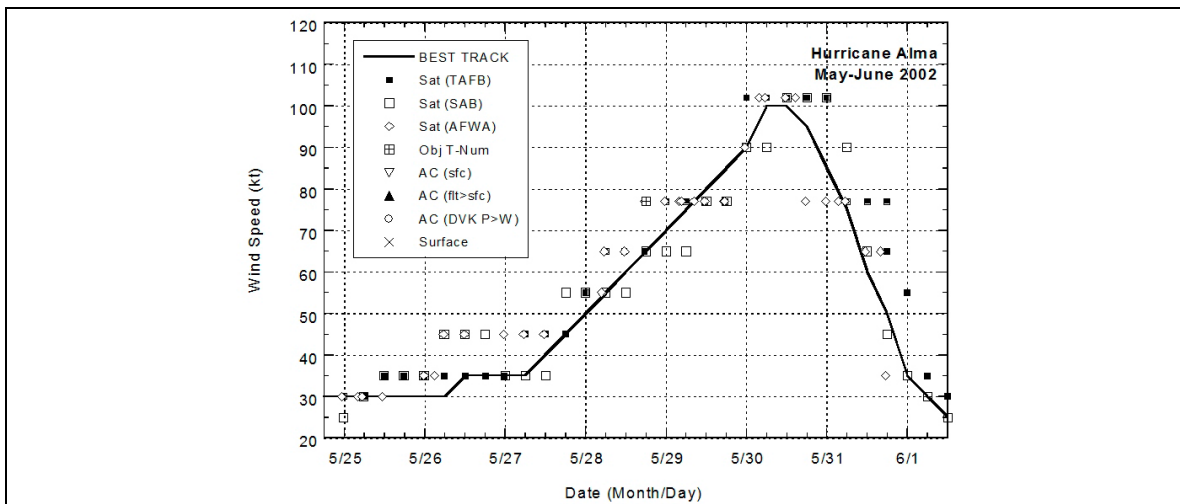

Fig. 2S1. Best Track data for TC Alma

Source: Stewart S.R. Tropical Cyclone Report Hurricane Alma 24 May-1 June 2002.

National Hurricane Center, 24 July 2002.

[https://www.nhc.noaa/data/tcr/EP012002\\_Alma.pdf](https://www.nhc.noaa/data/tcr/EP012002_Alma.pdf).

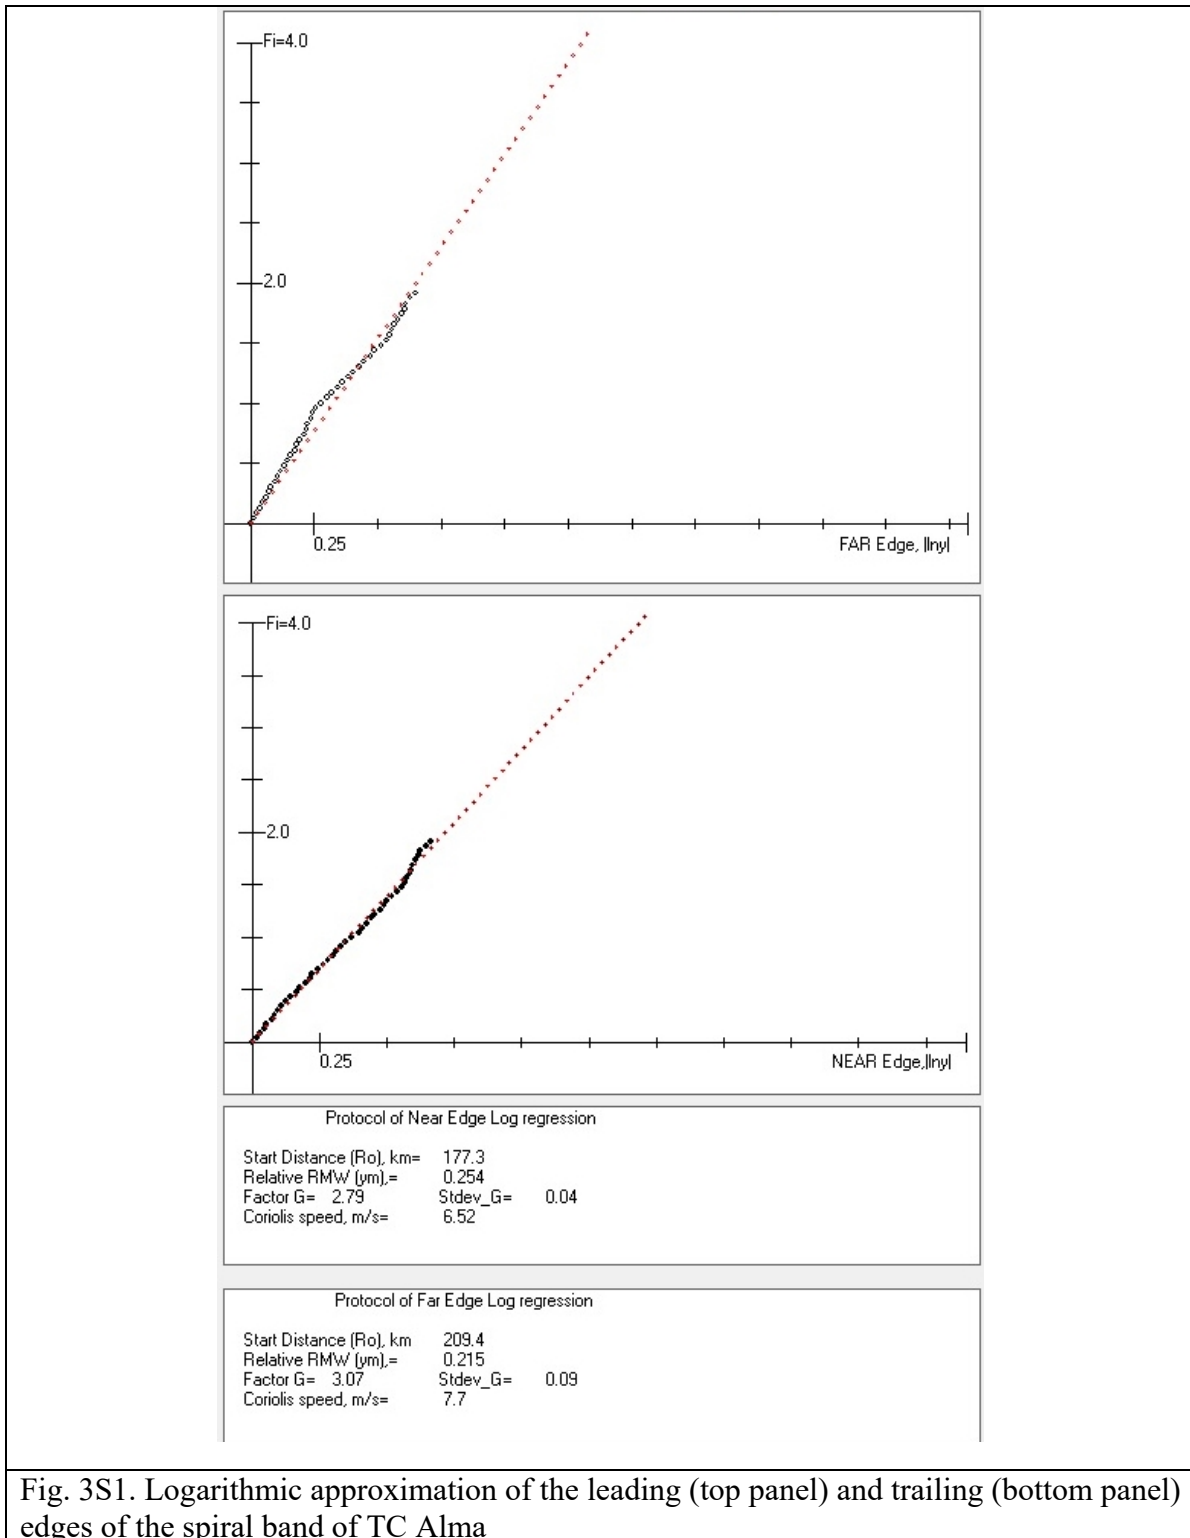

Fig. 3S1. Logarithmic approximation of the leading (top panel) and trailing (bottom panel) edges of the spiral band of TC Alma

## Supplemental file 2\_Dean

SAR Image index: 20070819231634

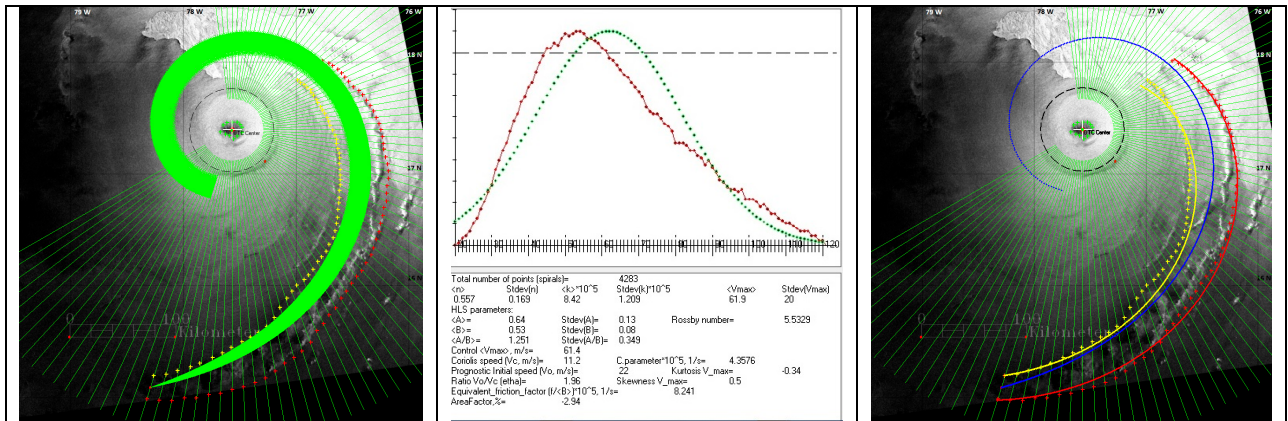

Fig. 1S2. HLS-approximation of spiral band of TC Dean at  $R_m=50$  km and  $V_m$  range=20-120 m/s; left panel: family of signature HLS; center panel: histogram of  $V_m$ ; right panel: mean HLS of the spiral band (blue curve), trailing (yellow curve) and leading (red curve) edges approximated by a logarithmic spiral

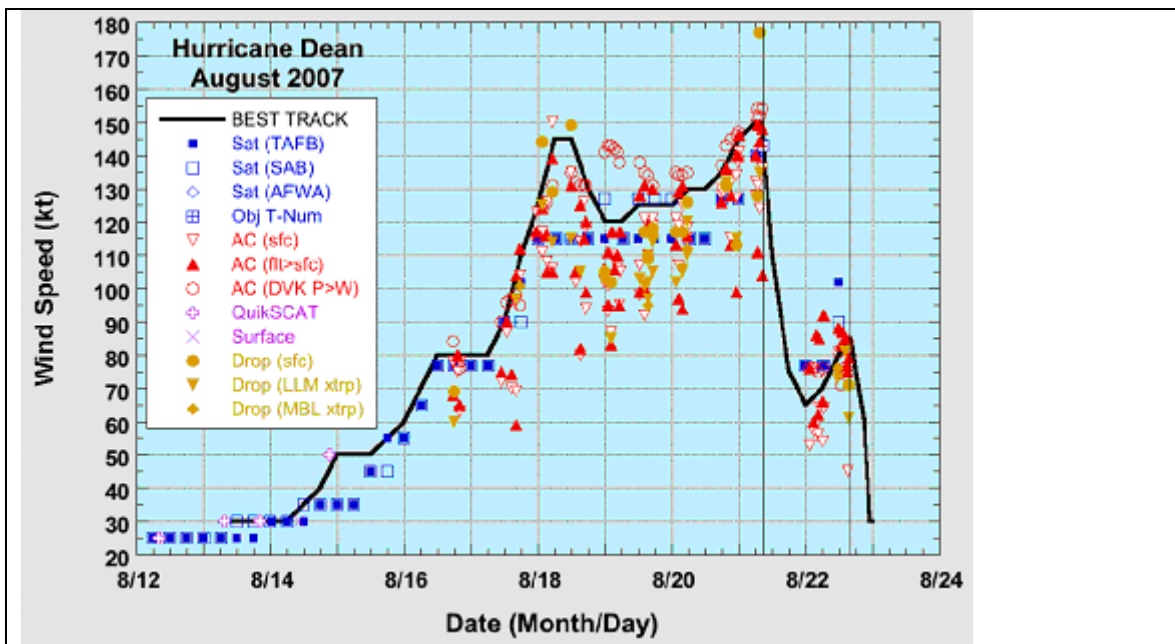

Fig. 2S2. Best track data for TC Dean

Source: Franklin J.L. Tropical Cyclone Report Hurricane Dean (AL042007) 13-23 August 2007. National Hurricane Center, 31 January 2008.  
[https://www.nhc.noaa.gov/data/tcr/AL042007\\_Dean.pdf](https://www.nhc.noaa.gov/data/tcr/AL042007_Dean.pdf)

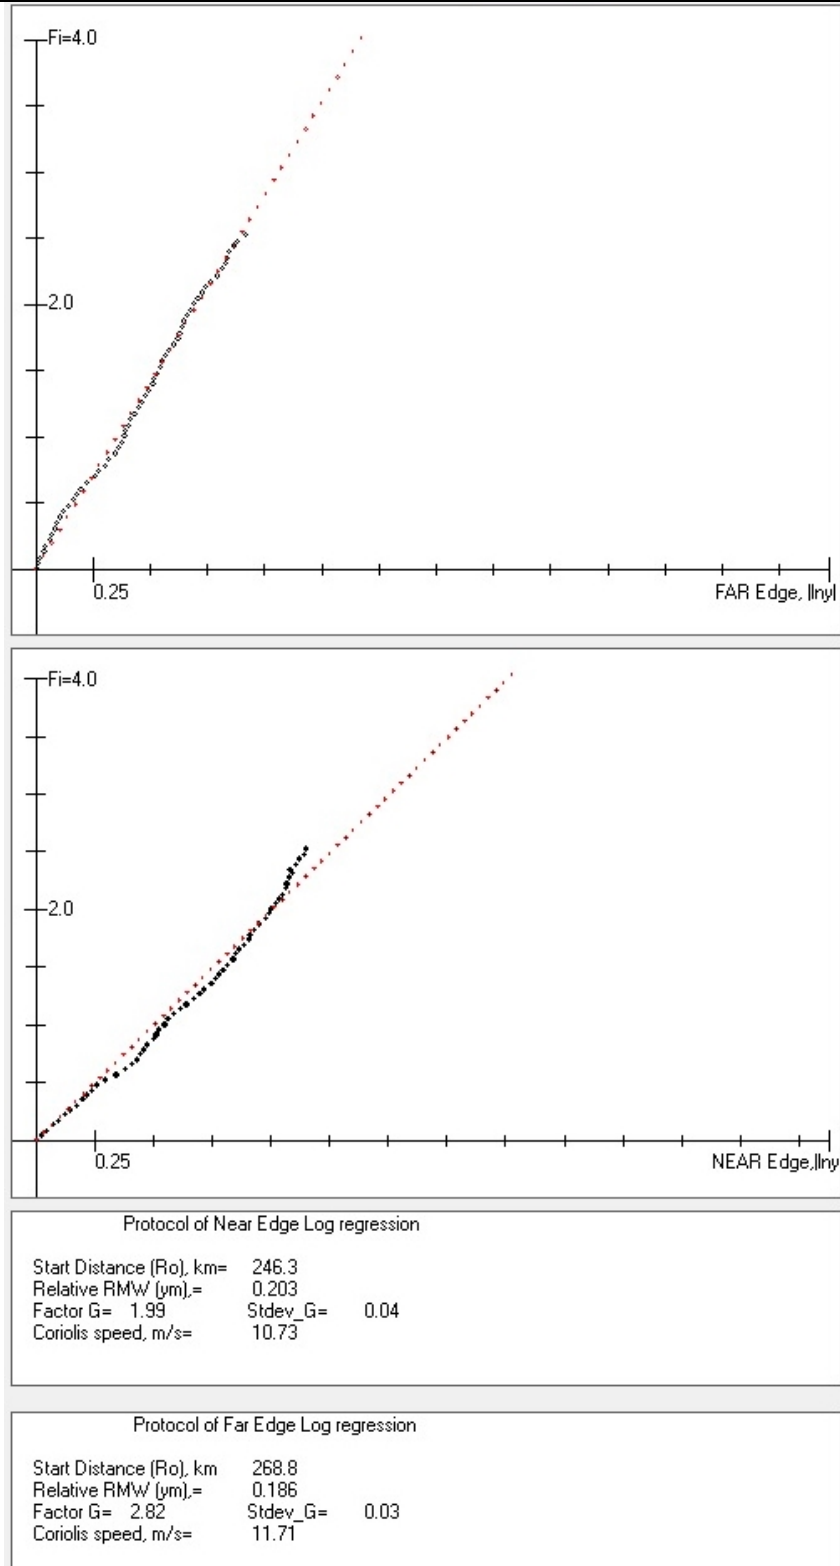

Fig. 3S2. Logarithmic approximation of the leading (top panel) and trailing (bottom panel) edges of the spiral band of TC Dean

# Supplemental file 3\_Ewiniar

SAR Image index: 20060703205345

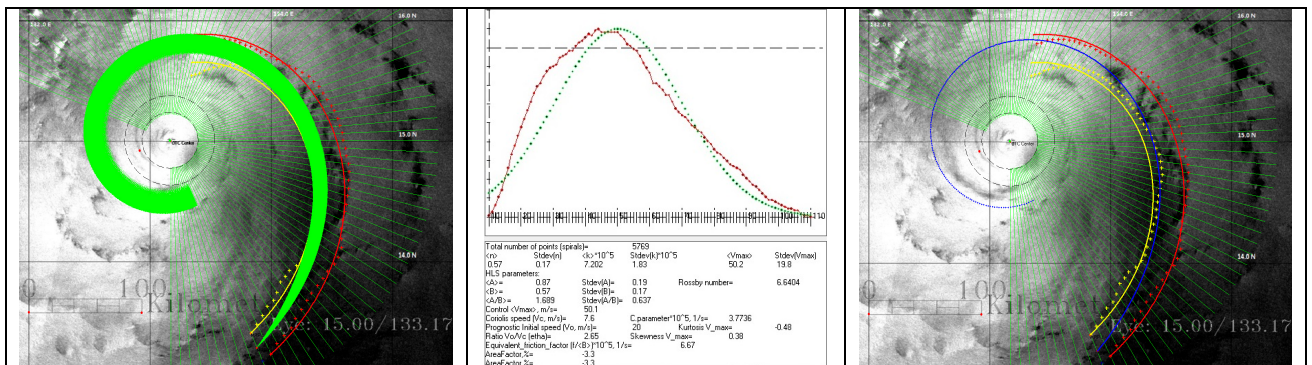

Figure 1S3 HLS-approximation of spiral band of TC Ewiniar at  $R_m=40$  km and  $V_m$  range=10-110 m/s; left panel: family of signature HLS; center panel: histogram of  $V_m$ ; right panel: mean HLS of the spiral band (blue curve); trailing (yellow curve) and leading (red curve) edges approximated by a logarithmic spiral

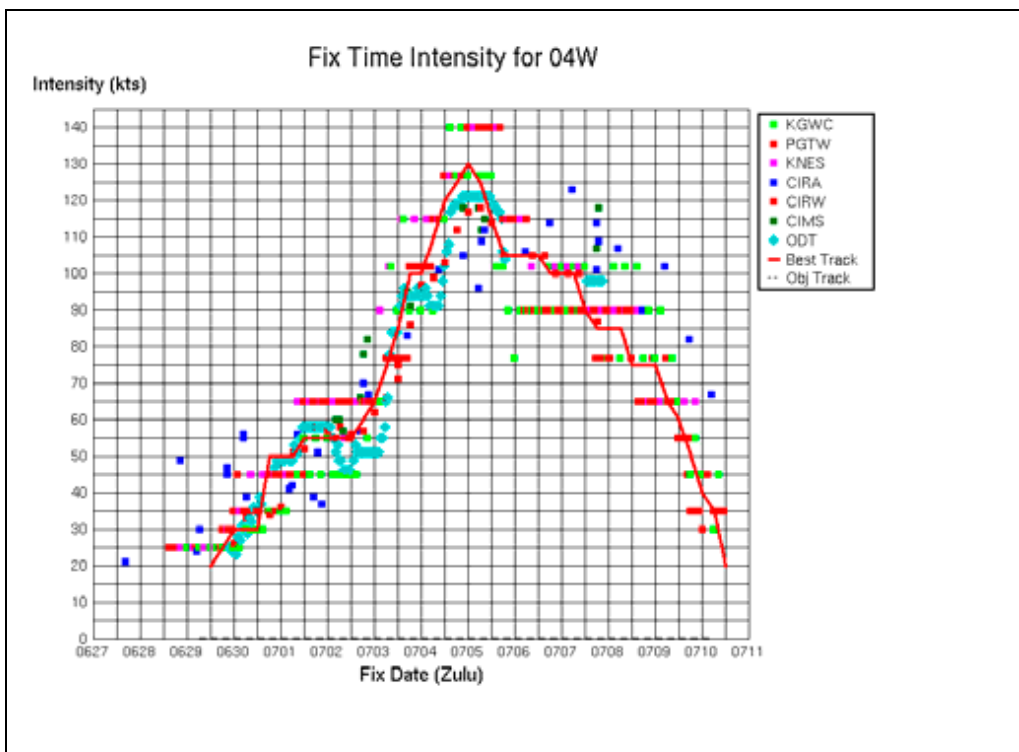

Fig. 2S3. Best Tack data for TC Ewiniar

Source: O'Hara J.F., Falvey R. 2006 Annual Tropical Cyclone Report. Super Typhoon 04W (Ewiniar) 29 June-10 July 2006. U.S. Naval Maritime Forecast Center/ Joint Typhoon Warning Center. Pearl Harbor, Hawaii, pp. 98, p.19. <https://www.metoc.navy.mil/jtwc/products/atcr/2006atcr.pdf>.

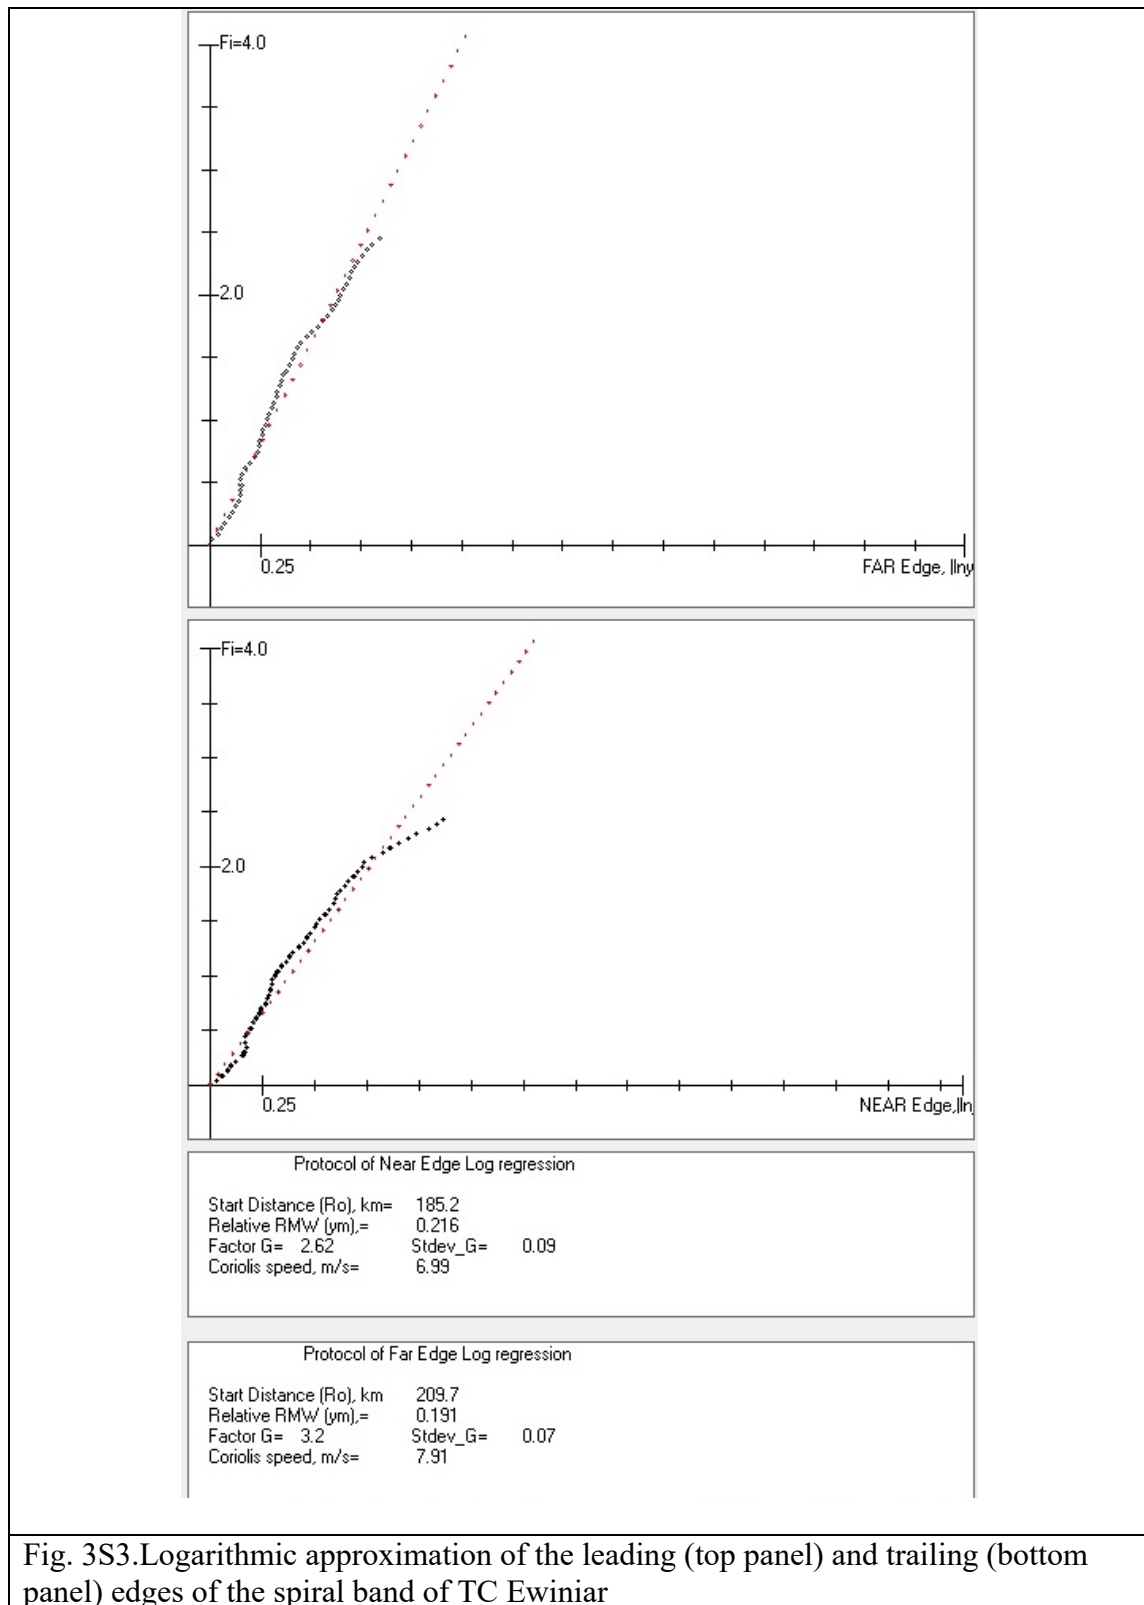

Fig. 3S3. Logarithmic approximation of the leading (top panel) and trailing (bottom panel) edges of the spiral band of TC Ewiniar

# Supplemental file 4 Flossie

SAR Image index: 200108301353745

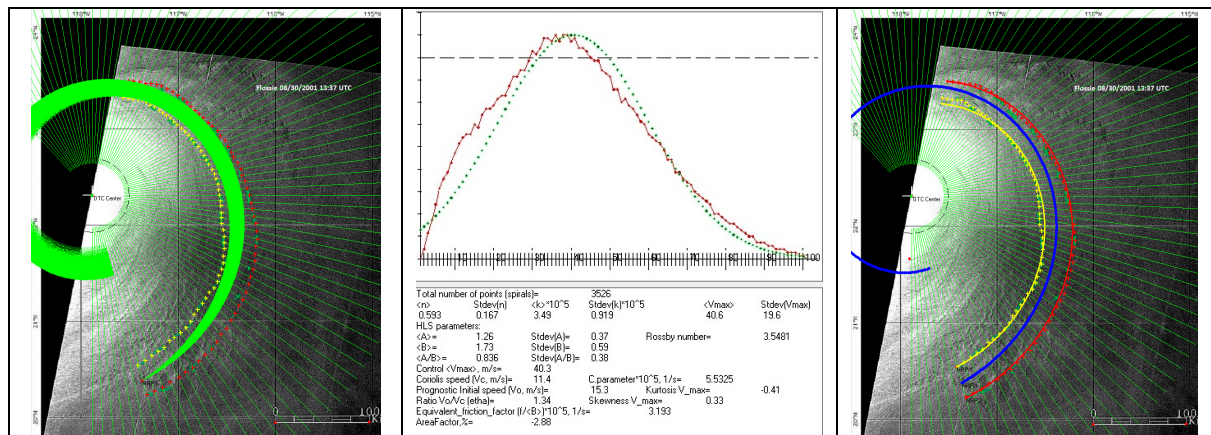

Fig. 1S4. HLS-approximation of spiral band of TC Flossie at  $R_m=40$  km and  $V_m$  range=1-100 m/s; left panel: family of signature HLS; center panel: histogram of  $V_m$ ; right panel: mean HLS of the spiral band (blue curve), trailing (yellow curve) and leading (red curve) edges approximated by a logarithmic spiral

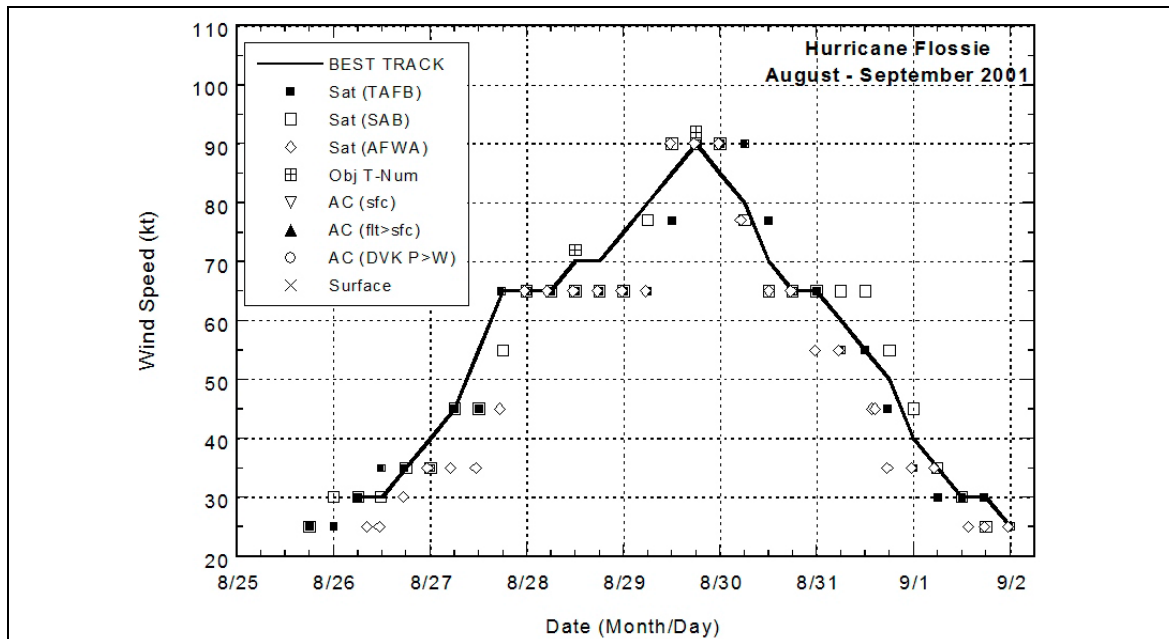

Fig. 2S4. Best Tack data for TC Flossie

Source: S.R. Stewart. Tropical Cyclone Report, Hurricane Flossie, 26 August-2 September 2001. National Hurricane Center. 27 October 2001.  
[https://www.nhc.noaa.gov/data/tcr/EP072001\\_Flossie.pdf](https://www.nhc.noaa.gov/data/tcr/EP072001_Flossie.pdf)

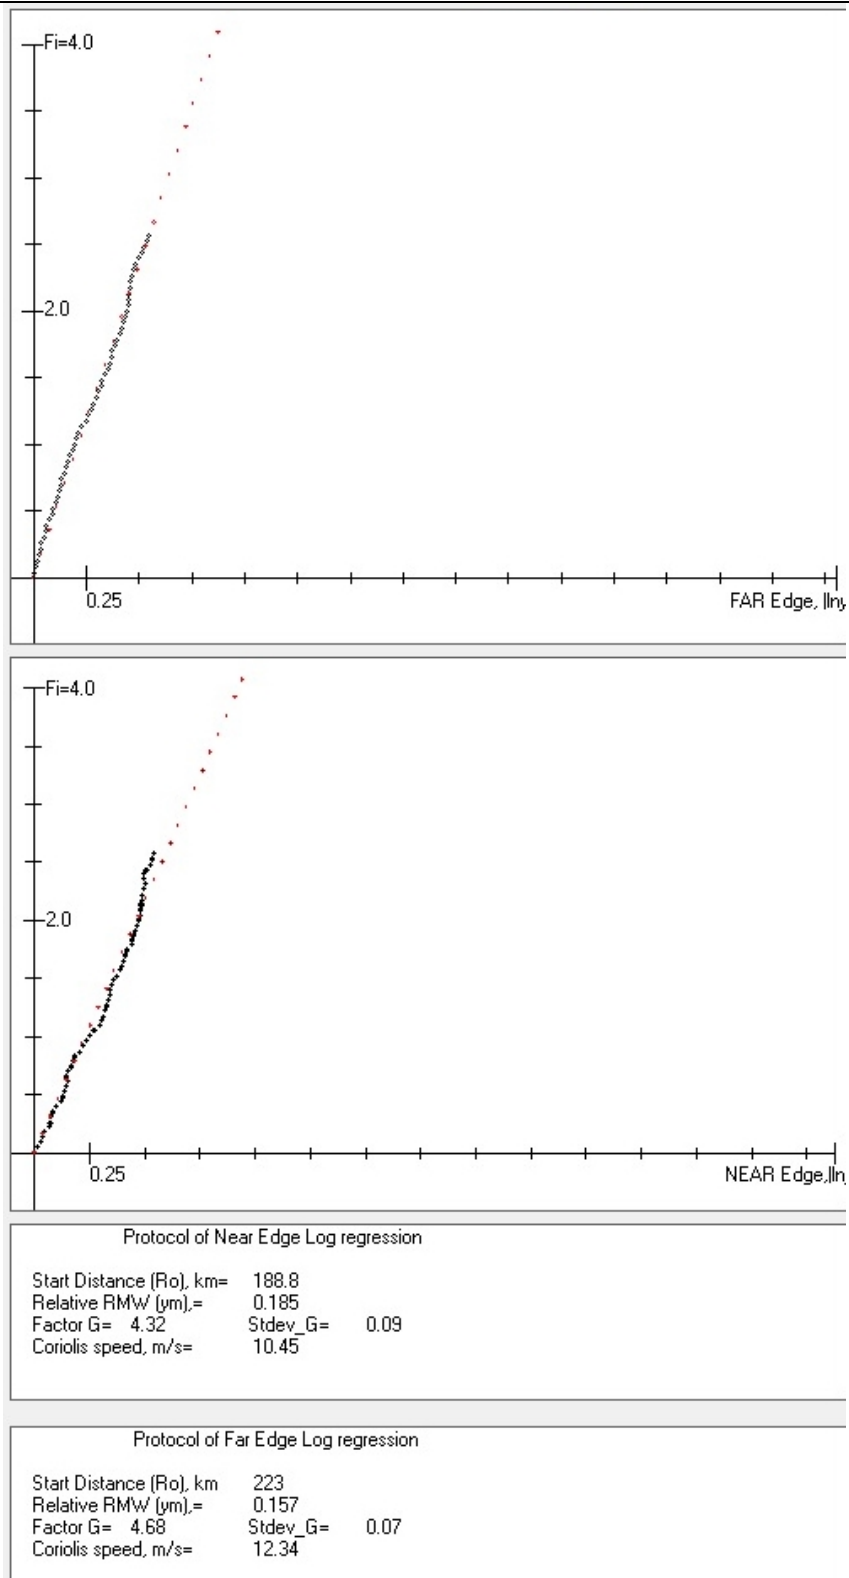

Fig. 3S4. Logarithmic approximation of the leading (top panel) and trailing (bottom panel) edges of the spiral band of TC Flossie

# Supplemental file 5 Franklin

SAR Image index: 20050728221603

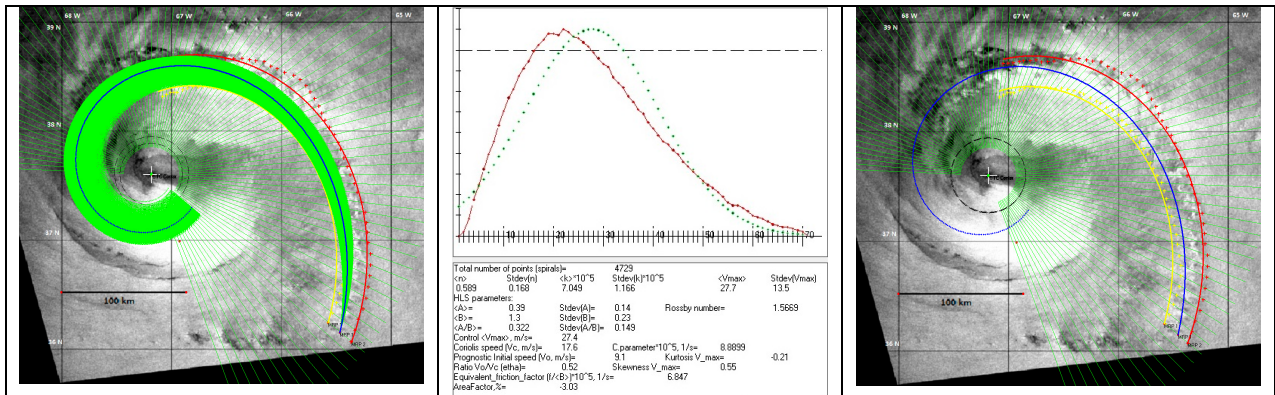

Figure 1S5. HLS-approximation of spiral band of TC Franklin at  $R_m=30$  km and  $V_m$  range=1-70 m/s; left panel: family of signature HLS; center panel: histogram of  $V_m$ ; right panel: mean HLS of the spiral band (blue curve); trailing (yellow curve) and leading (red curve) edges smoothed by a logarithmic spiral

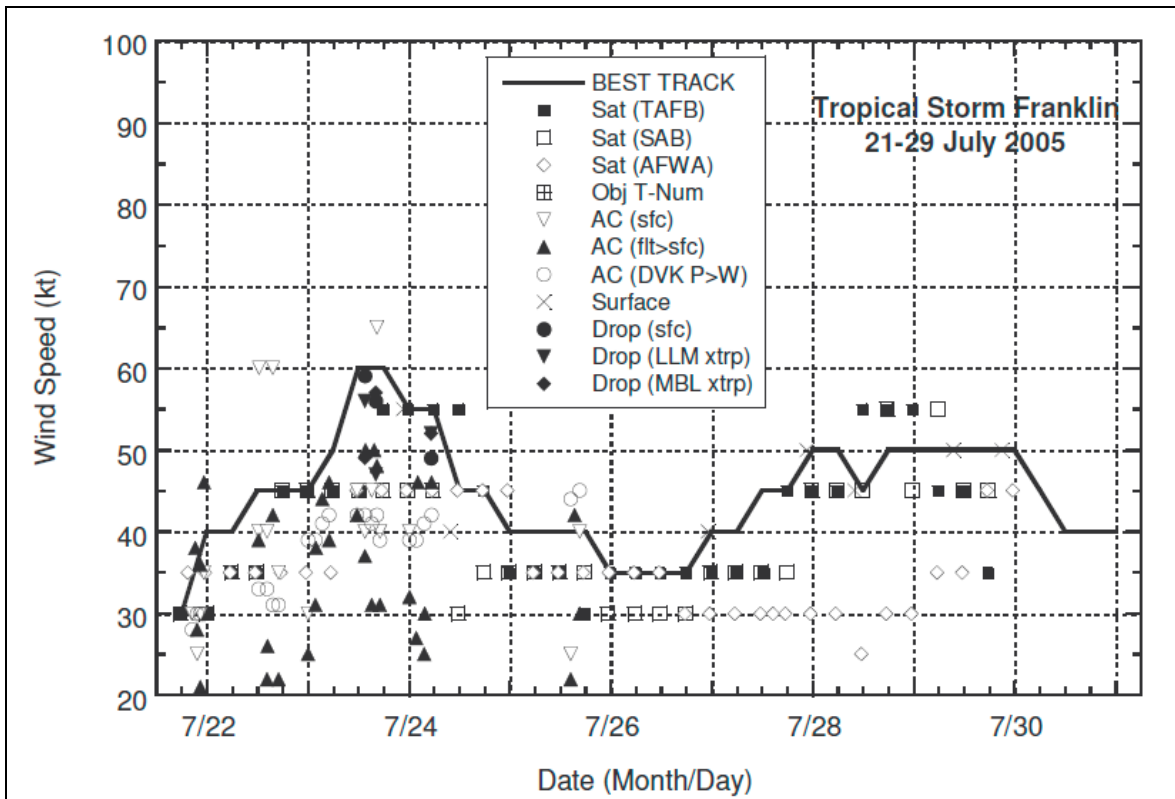

Fig. 2S5. Best Tack data for TC Franklin

Source: Knabb R.D. Tropical Cyclone Report, Tropical Storm Franklin 21-29 July 2005. National Hurricane Center, 17 March 2006.

[https://www.nhc.noaa.gov/data/tcr/AL062005\\_Franklin.pdf](https://www.nhc.noaa.gov/data/tcr/AL062005_Franklin.pdf)

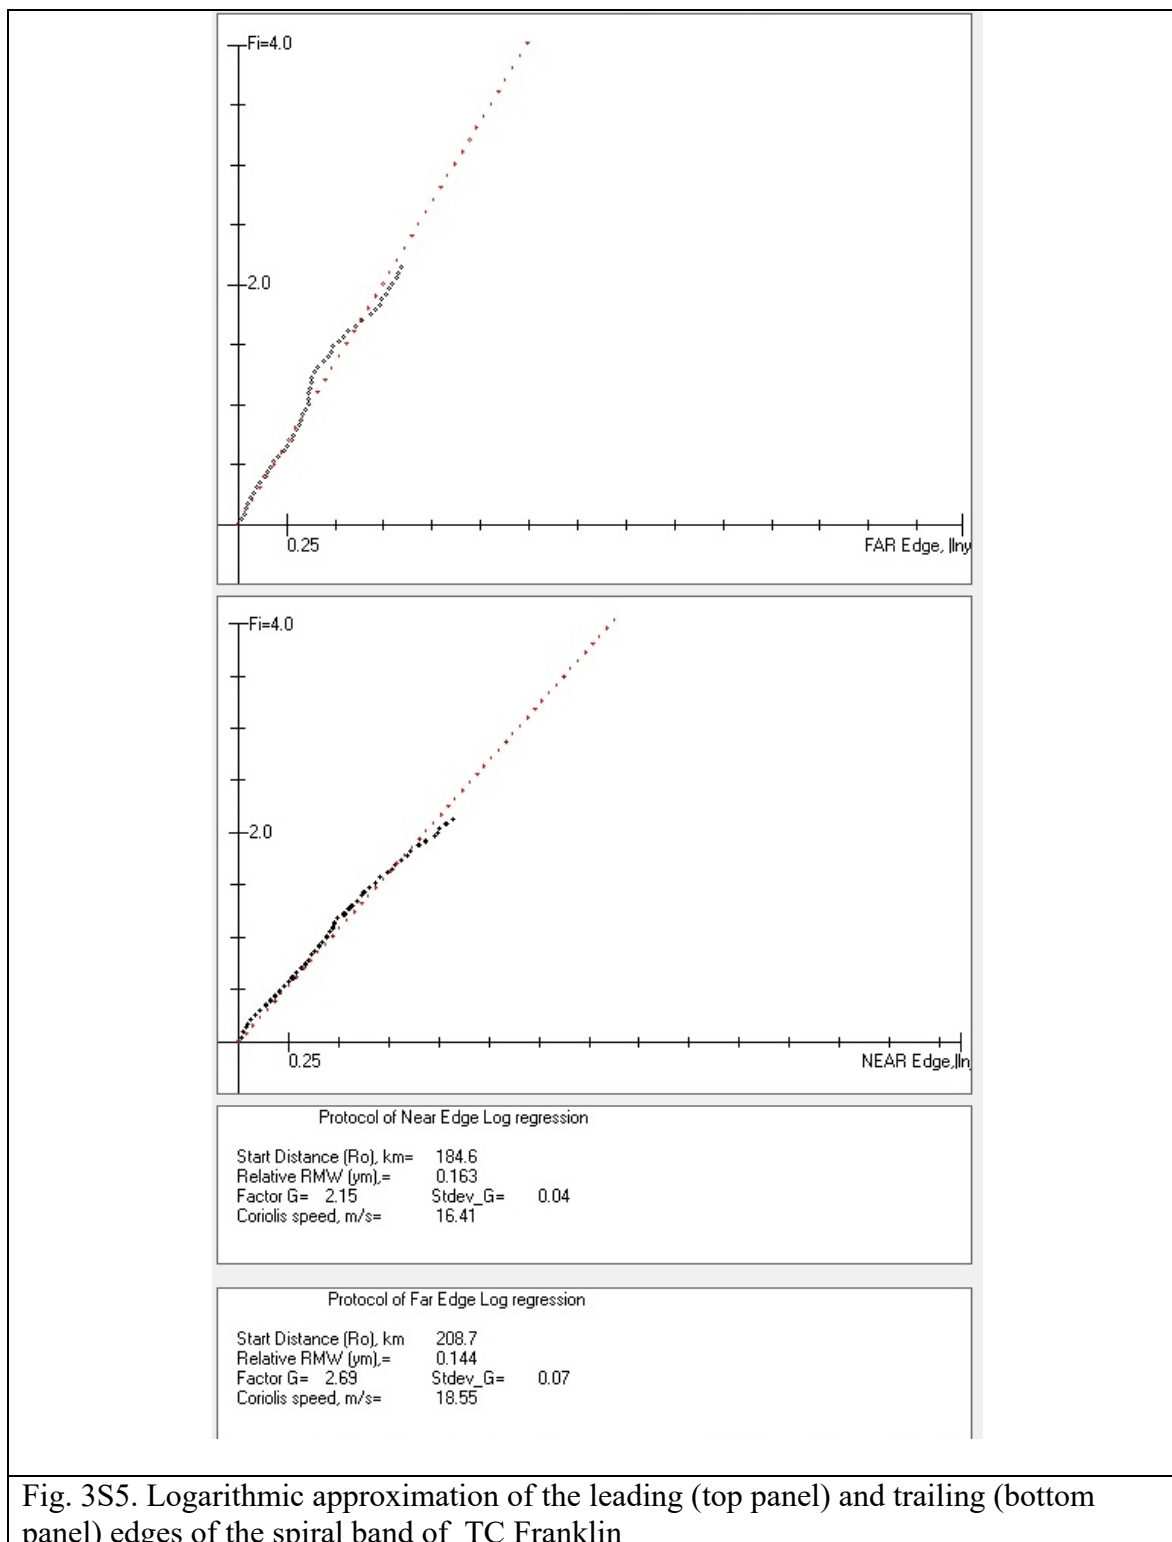

Fig. 3S5. Logarithmic approximation of the leading (top panel) and trailing (bottom panel) edges of the spiral band of TC Franklin

## Supplemental file 6\_Javier

SAR Image index: 20040917012033

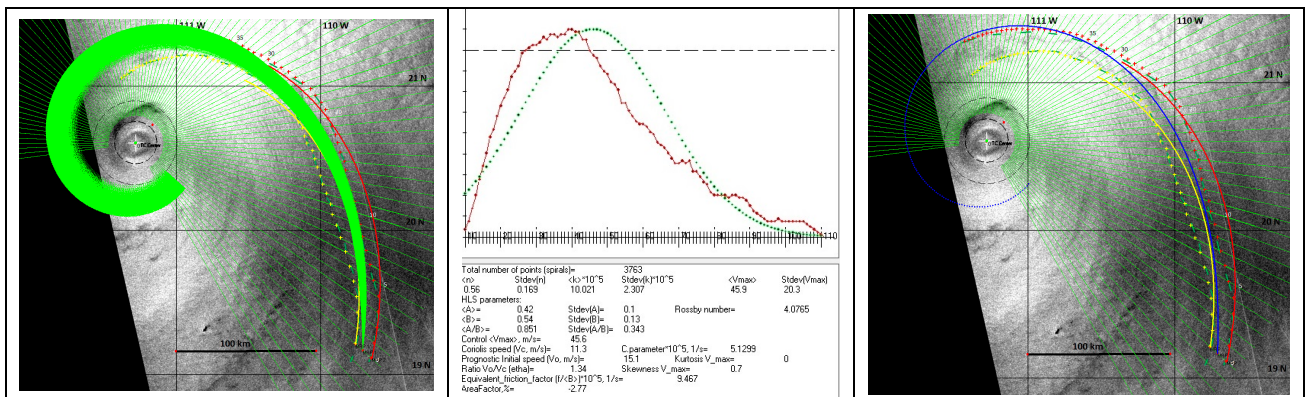

Fig. 1S6. HLS-approximation of spiral band of TC Javier at  $R_m=30$  km and  $V_m$  range=10-110 m/s; left panel: family of signature HLS; center panel: histogram of  $V_m$ ; right panel: mean HLS of the spiral band (blue curve). Approximation interval=0-30 points. Trailing (yellow curve) and leading (red curve) edges approximated by a logarithmic spiral

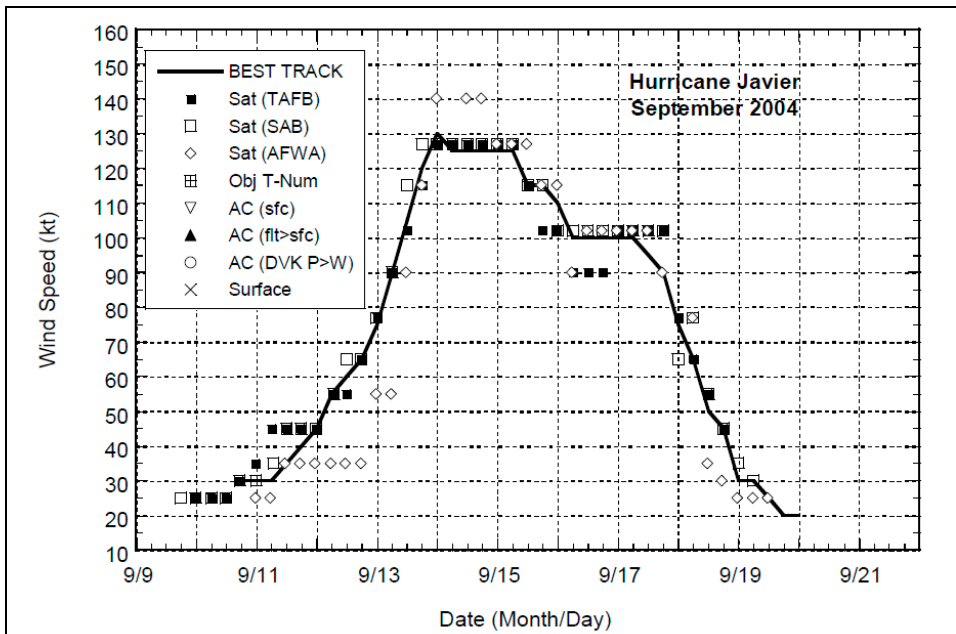

Fig. 2S6. Best Tack data for TC Javier

Source: Avila L.A. Tropical Cyclone Report, Hurricane Javier 10-15 September 2004. National Hurricane Center, 15 November 2004.  
[https://www.nhc.noaa.gov/data/tcr/EP132004\\_Javier.pdf](https://www.nhc.noaa.gov/data/tcr/EP132004_Javier.pdf).

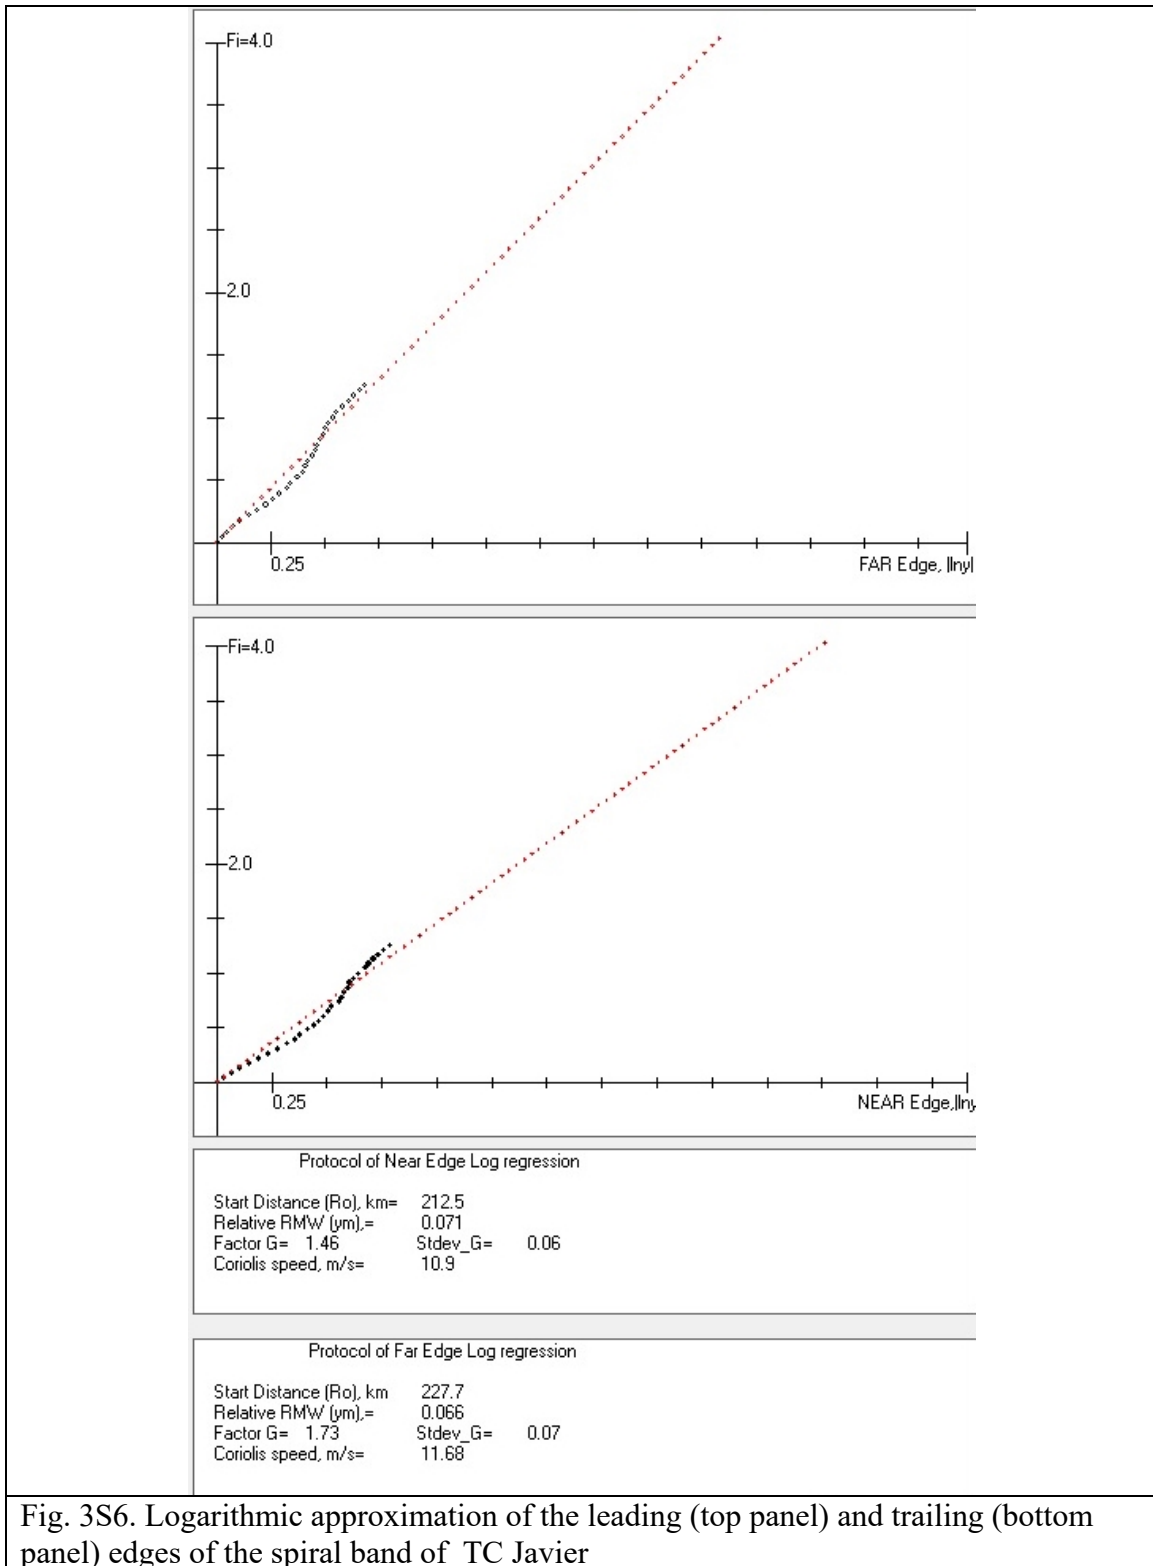

Fig. 3S6. Logarithmic approximation of the leading (top panel) and trailing (bottom panel) edges of the spiral band of TC Javier

## Supplemental file 7 Jova

SAR Image index: 20050919152220

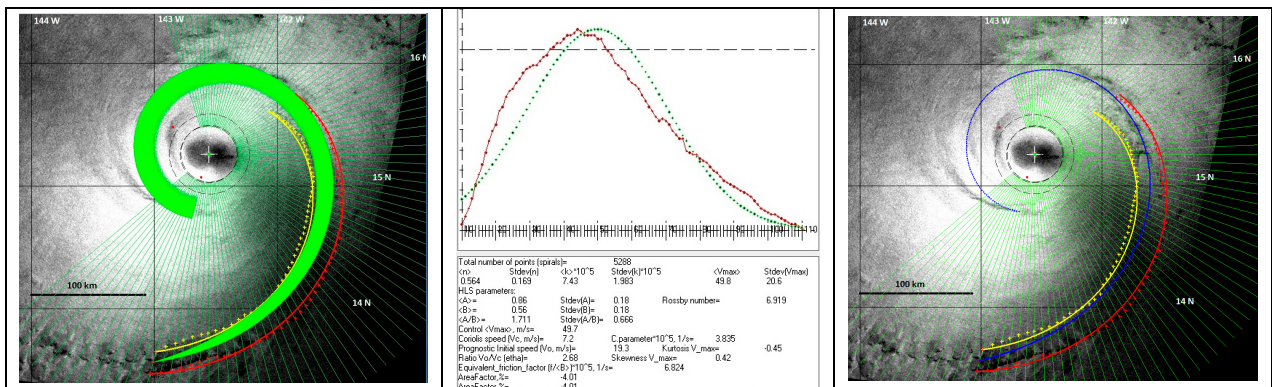

Figure 1S7. HLS-approximation of spiral band of TC Jova at  $R_m=35$  km and  $V_m$  range=10-110 m/s; left panel: family of signature HLS; center panel: histogram of  $V_m$ ; right panel: mean HLS of the spiral band (blue curve); trailing (yellow curve) and leading (red curve) edges smoothed by a logarithmic spiral

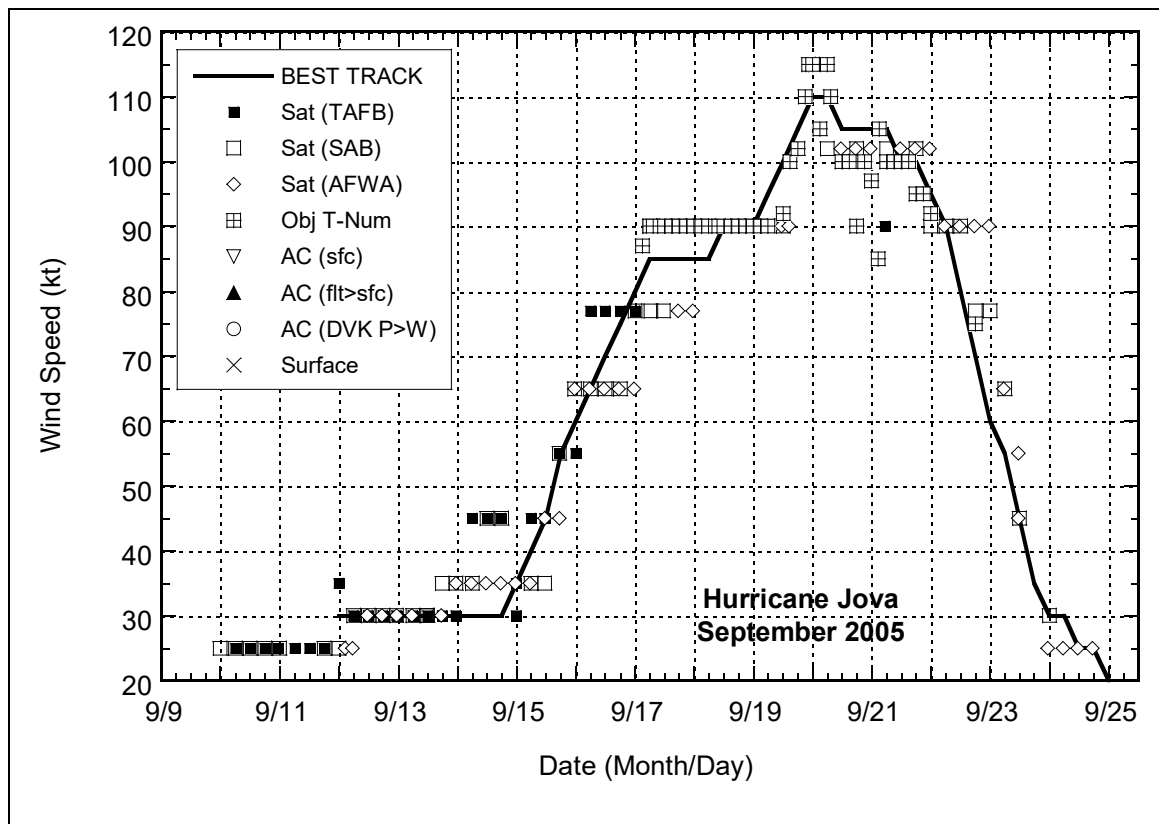

Fig. 2S7. Best Track data for TC Jova

Source: Stewart S.R. Tropical Cyclone Report, Hurricane Jova, 12-25 September 2005.

National Hurricane Center, 27 February 2006.

[https://www.nhc.noaa.gov/data/tcr/EP102005\\_Jova.pdf](https://www.nhc.noaa.gov/data/tcr/EP102005_Jova.pdf)

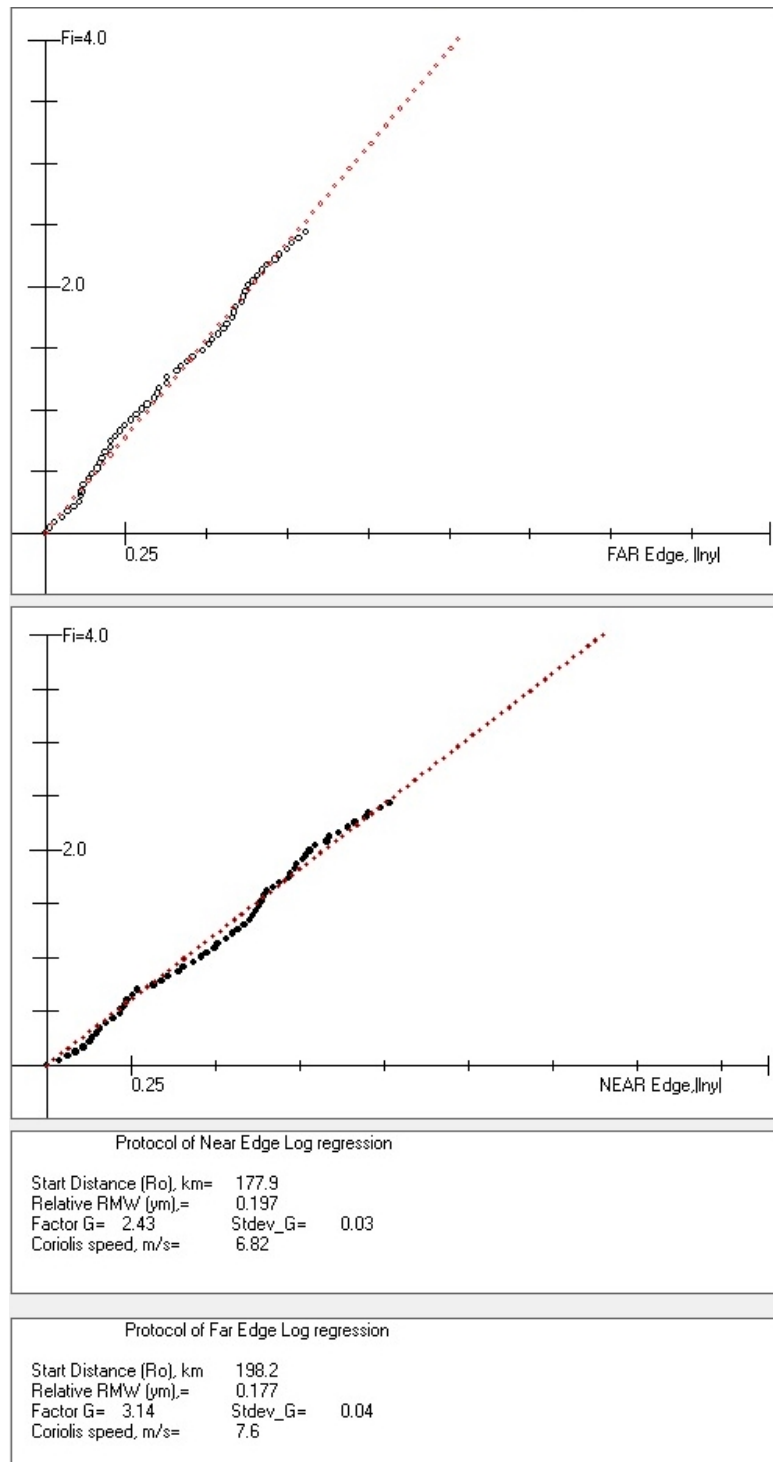

Fig. 3S7. Logarithmic approximation of the leading (top panel) and trailing (bottom panel) edges of the spiral band of TC Jova

SAR Image index: 20050828234840

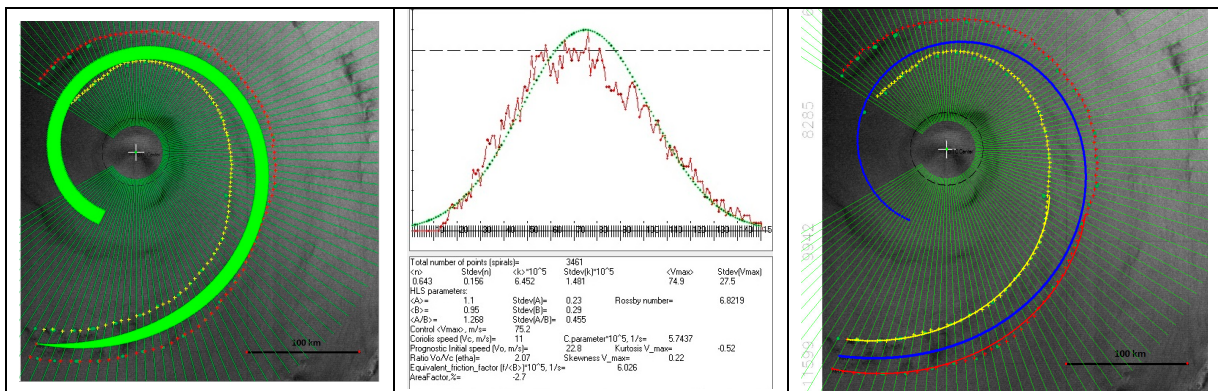

Fig. 1S8. HLS-approximation of spiral band of TC Katrina at  $R_m=30$  km and  $V_m$  range=1-150 m/s; left panel: family of signature HLS; center panel: histogram of  $V_m$ ; right panel: mean HLS of the spiral band (blue curve); the initial portions of trailing (yellow curve) and leading (red curve) edges approximated by a logarithmic spiral

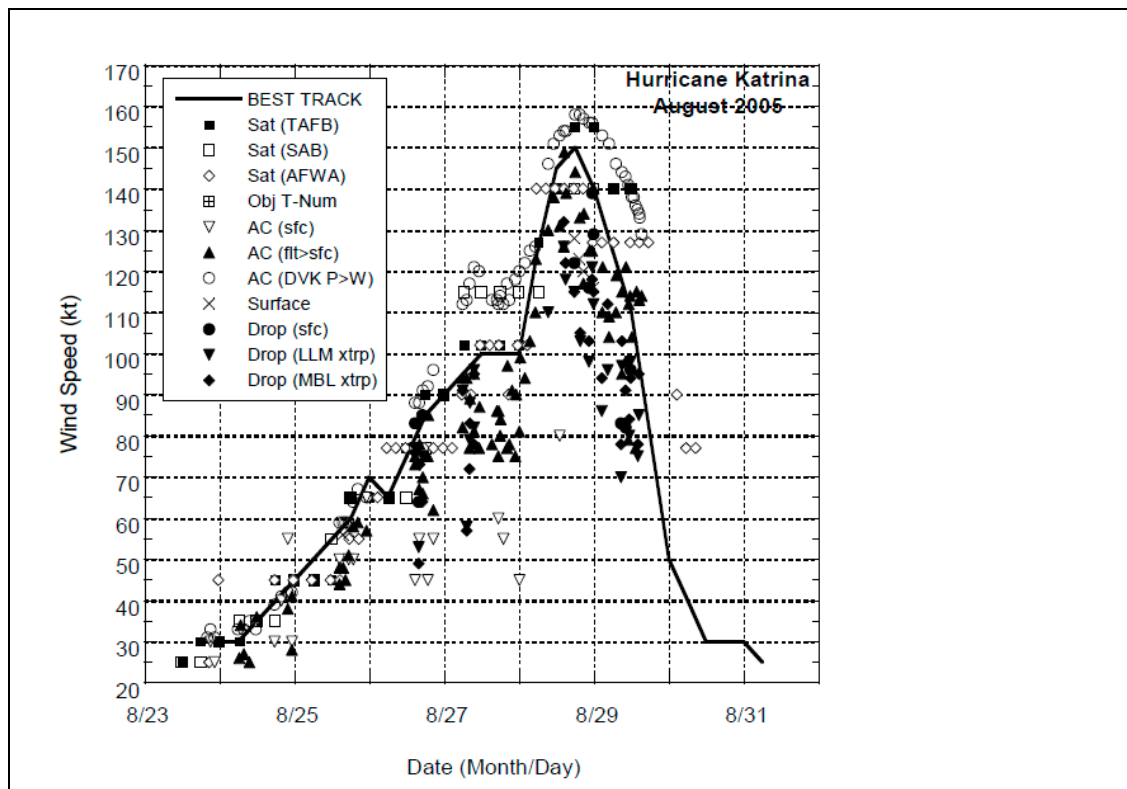

Fig. 2S8. Best Tack data for TC Katrina

Source: Knabb R.D. et al. Tropical Cyclone Report, Hurricane Katrina, 23-30 August 2005. National Hurricane Center, 20 December 2005.

[https://www.nhc.noaa.gov/data/tcr/AL122005\\_Katrina.pdf](https://www.nhc.noaa.gov/data/tcr/AL122005_Katrina.pdf).

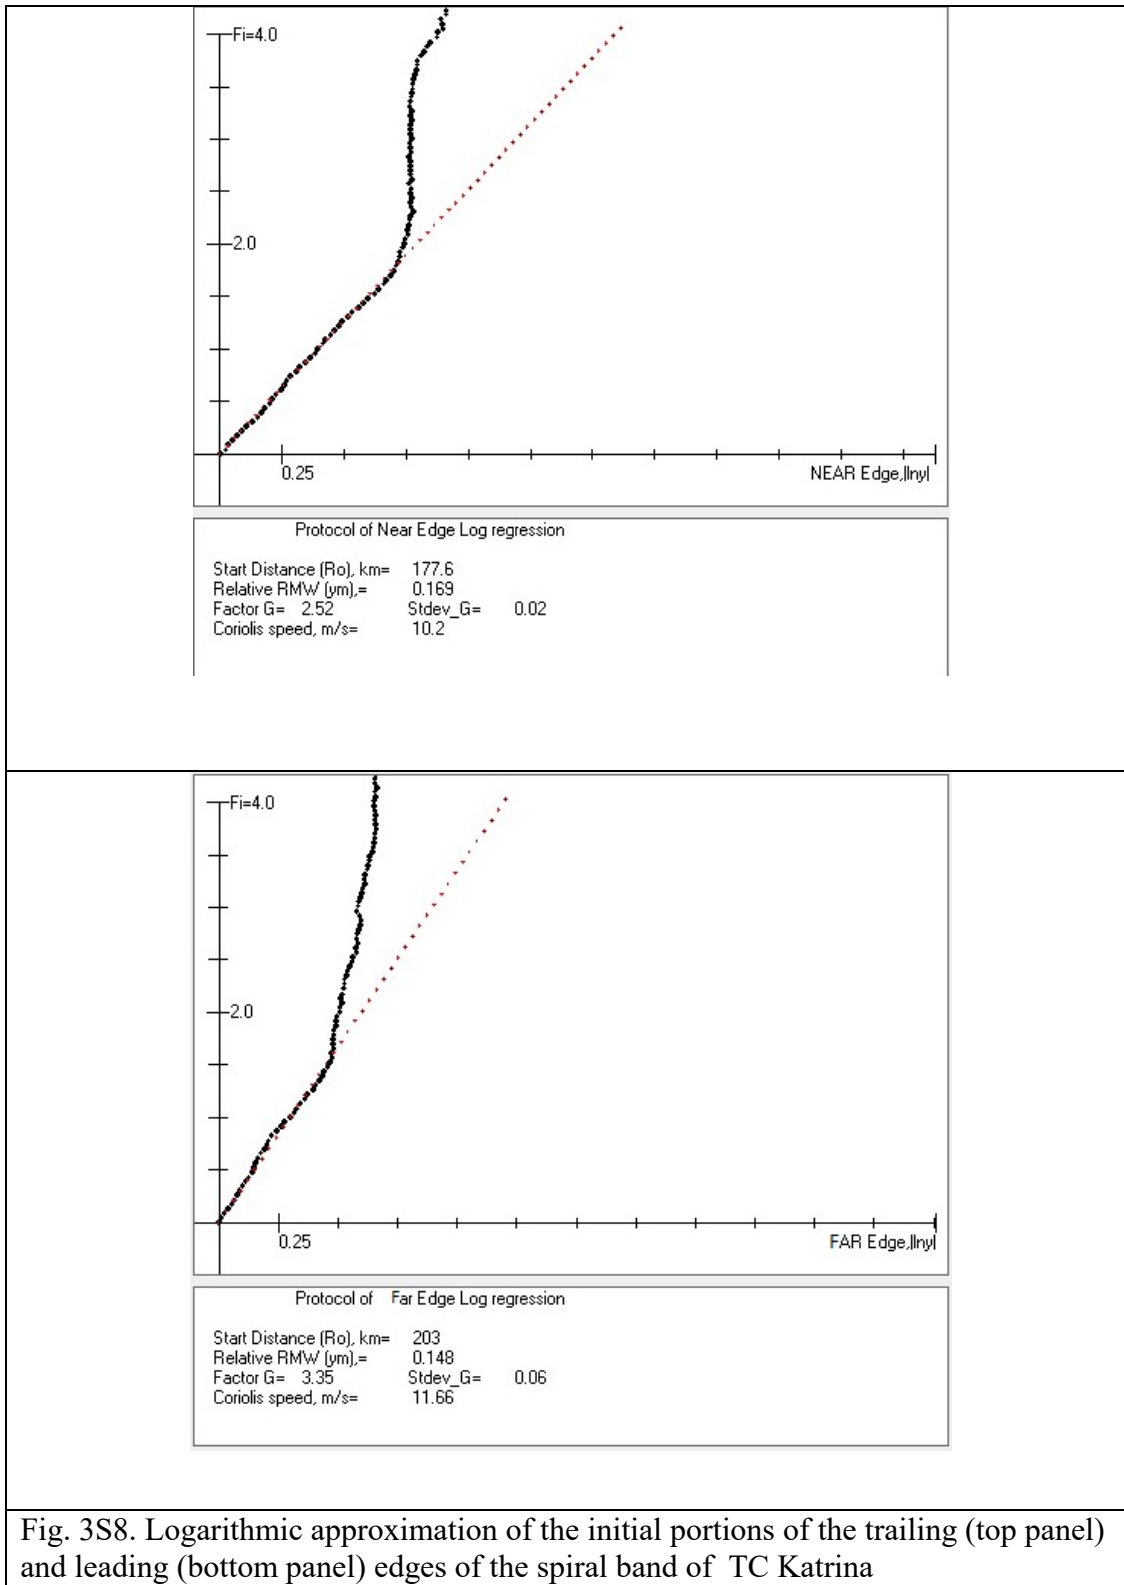

## Supplemental file 9\_Kenneth

SAR Image index: 20050925032031

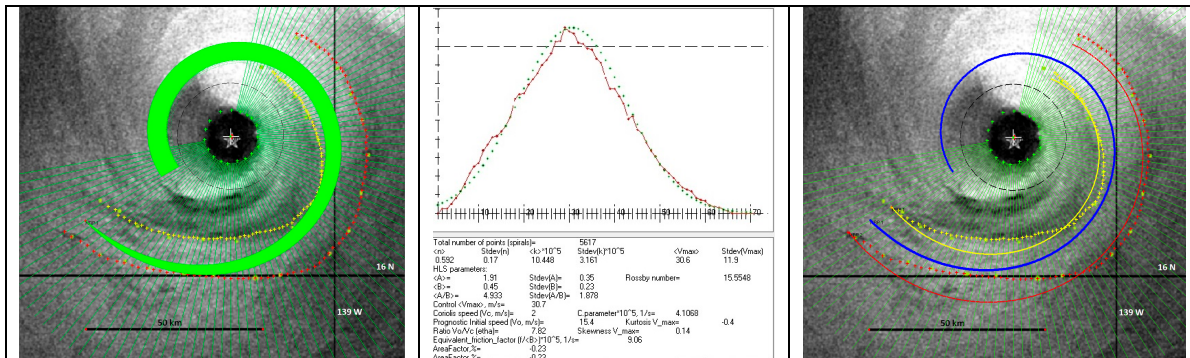

Fig. 1S9. HLS-approximation of spiral band of TC Kenneth at  $R_m=15$  km and  $V_m$  range=1-65 m/s; left panel: family of signature HLS; center panel: histogram of  $V_m$ ; right panel: mean HLS of the spiral band (blue curve), trailing (yellow curve) and leading (red curve) edges approximated by a logarithmic spiral

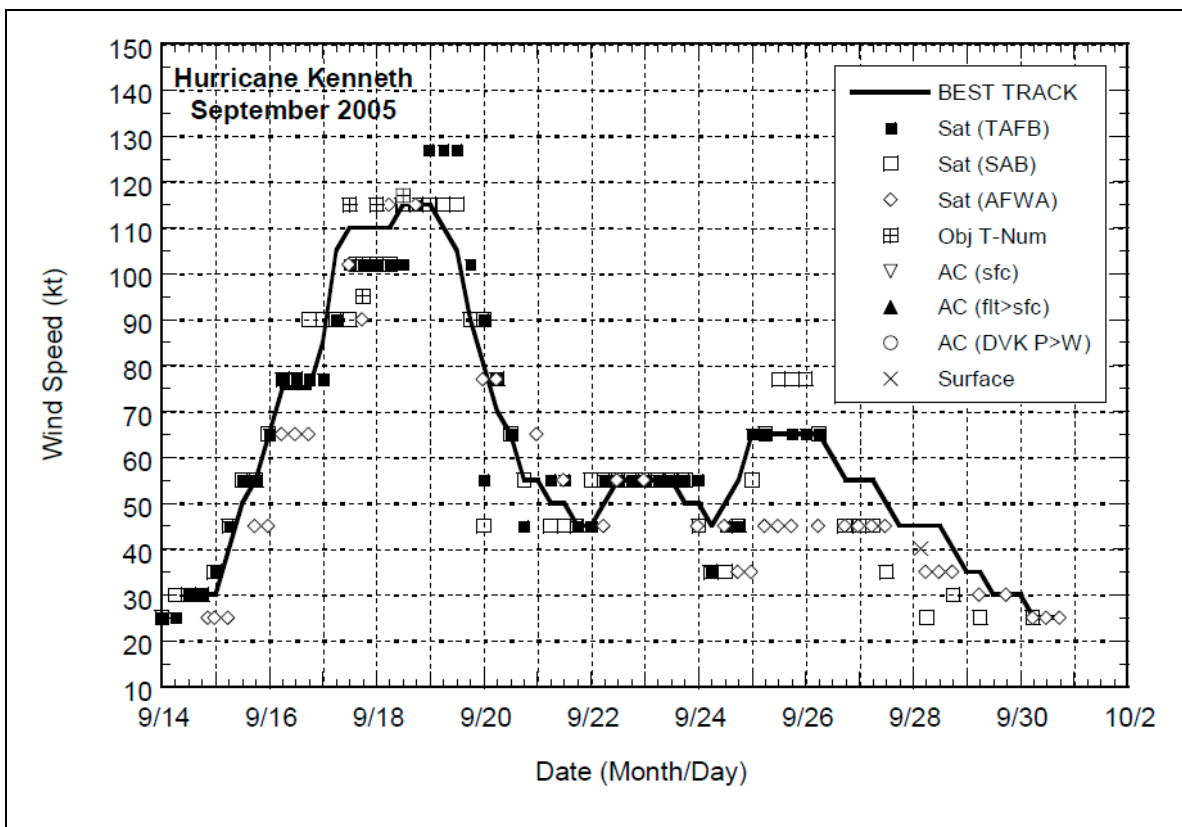

Fig. 2S9. Best Tack data for TC Kenneth  
Source: Pasch R.J. Tropical Cyclone Report, Hurricane Kenneth, 14-30 September 2005. National Hurricane Center, 20 April 2006.  
[https://www.nhc.noaa.gov/data/tcr/EP112005\\_Kenneth.pdf](https://www.nhc.noaa.gov/data/tcr/EP112005_Kenneth.pdf).

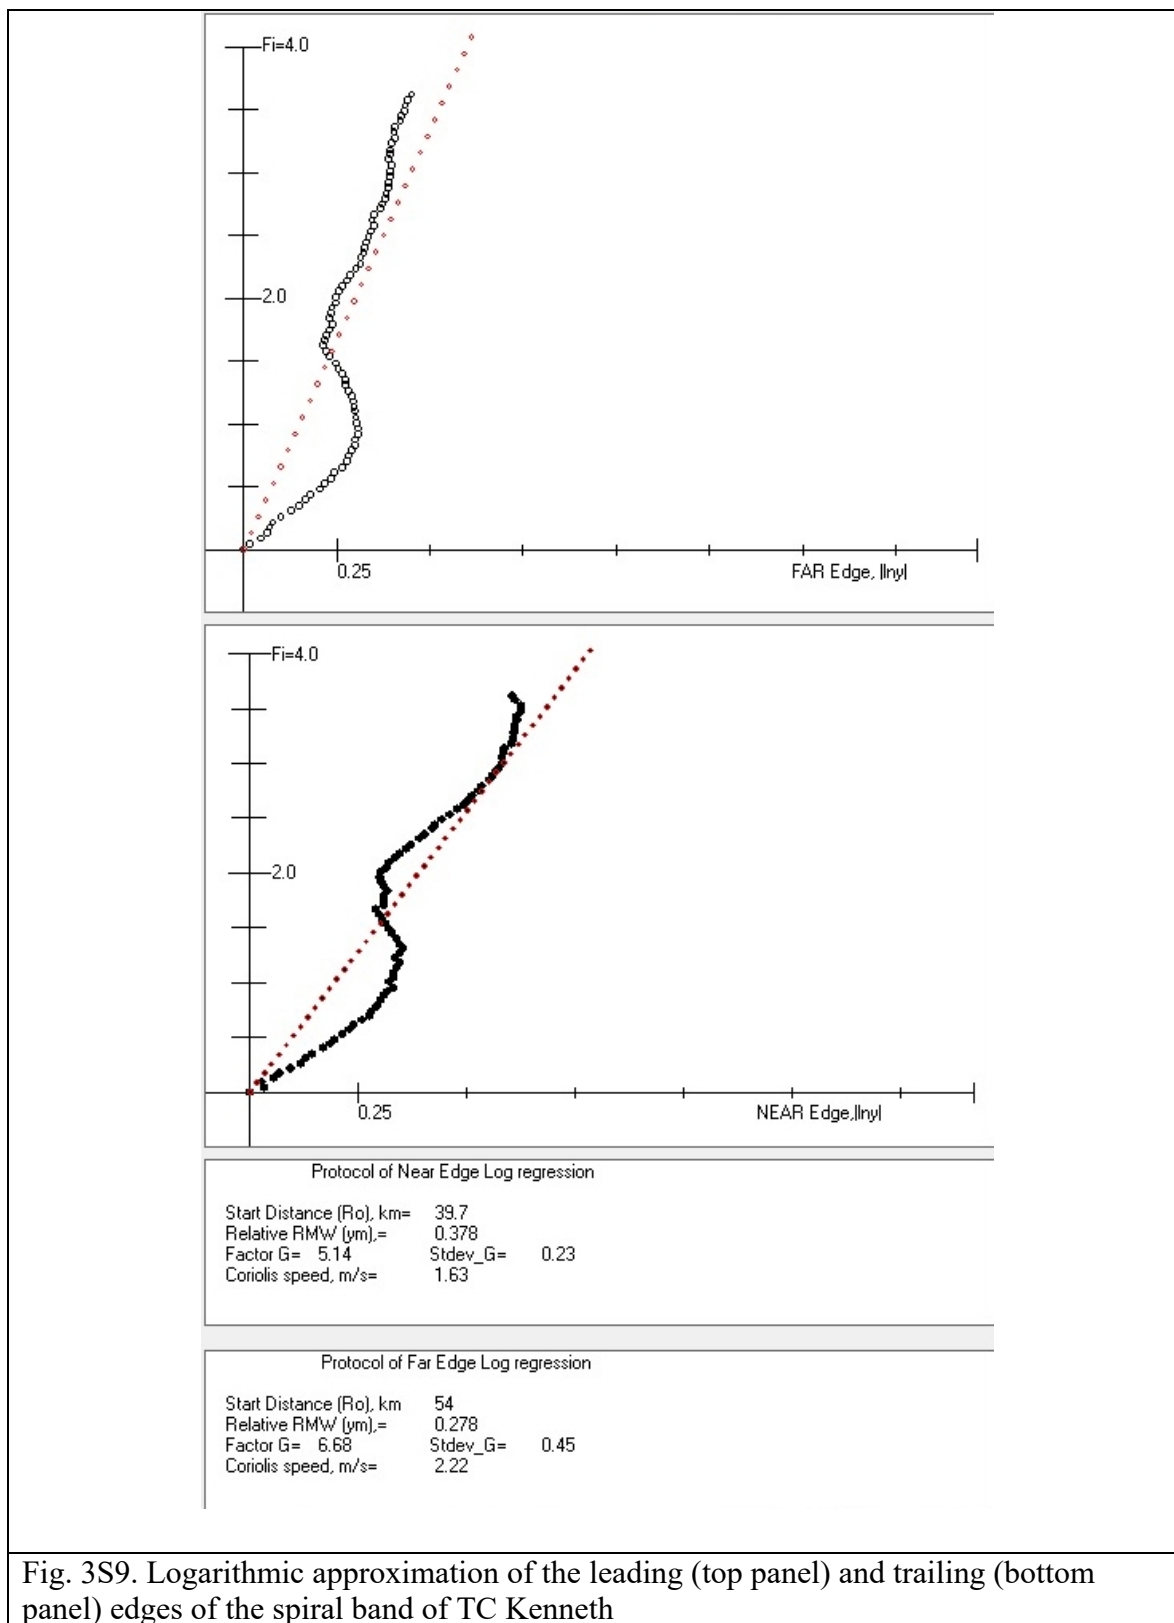

Fig. 3S9. Logarithmic approximation of the leading (top panel) and trailing (bottom panel) edges of the spiral band of TC Kenneth

## Supplemental file 3.10 Kirogi

SAR Image index: 20051015210400

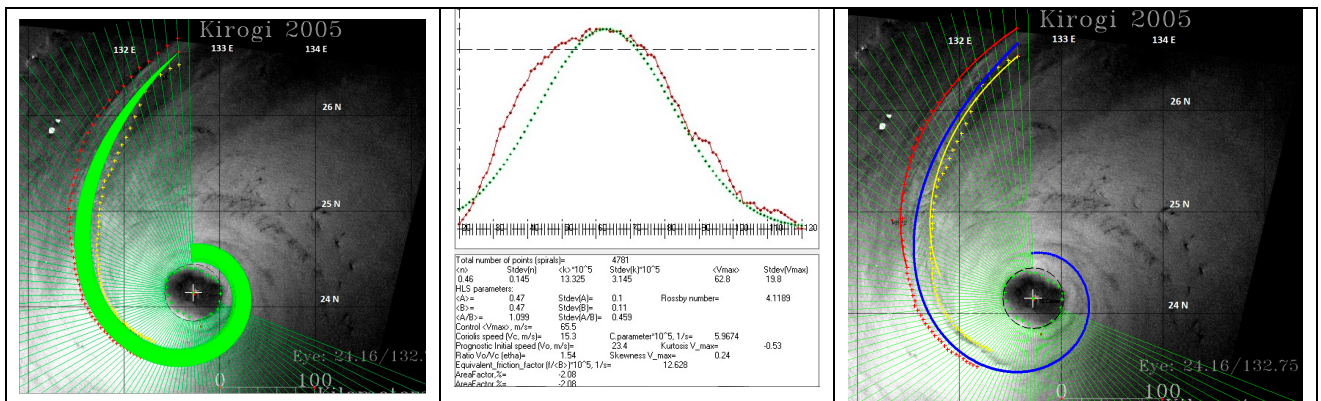

Fig. 1S10. HLS-approximation of spiral band of TC Kirogi at  $R_m=30$  km and  $V_m$  range=20-120 m/s; left panel: family of signature HLS; center panel: histogram of  $V_m$ ; right panel: mean HLS of the spiral band (blue curve), the initial portions of trailing (yellow curve) and leading (red curve) edges approximated by a logarithmic spiral

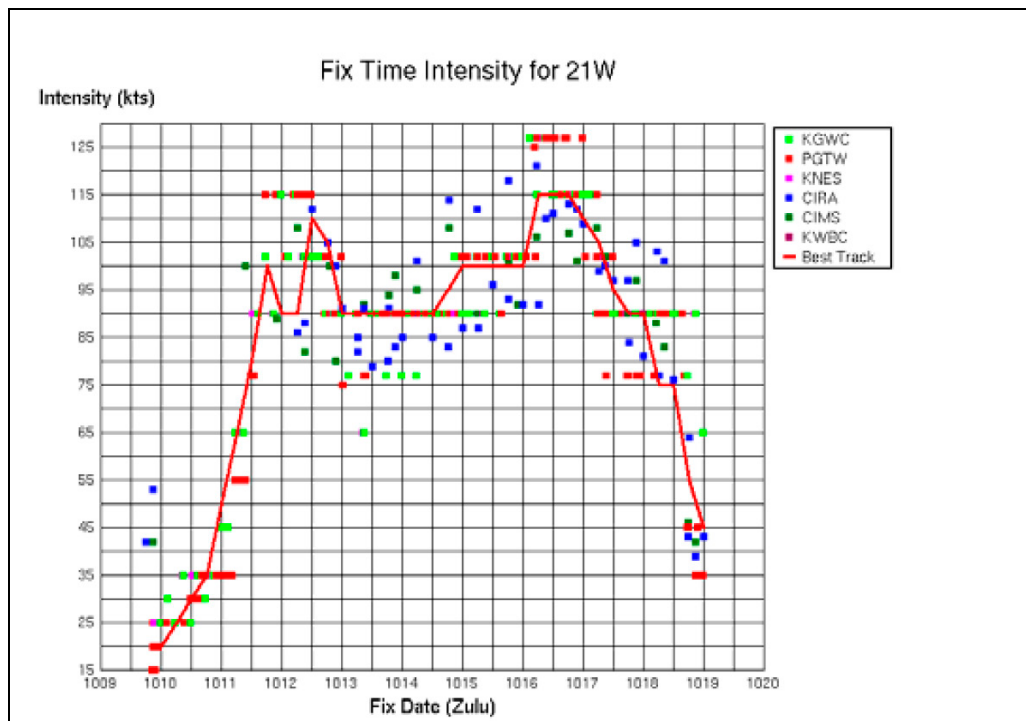

Fig. 2S10. Best Tack data for TC Kirogi

Source: Atangan J.F., Preble A. 2005 Annual Tropical Cyclone Report. Typhoon 21W (Kirogi) 10-19 October 2005. U.S. Naval Maritime Forecast Center/ Joint Typhoon Warning Center. Pear Harbor, Hawaii, pp. 109, p.38. <https://www.metoc.navy.mil/jtwc/products/atcr/2005atcr.pdf>.

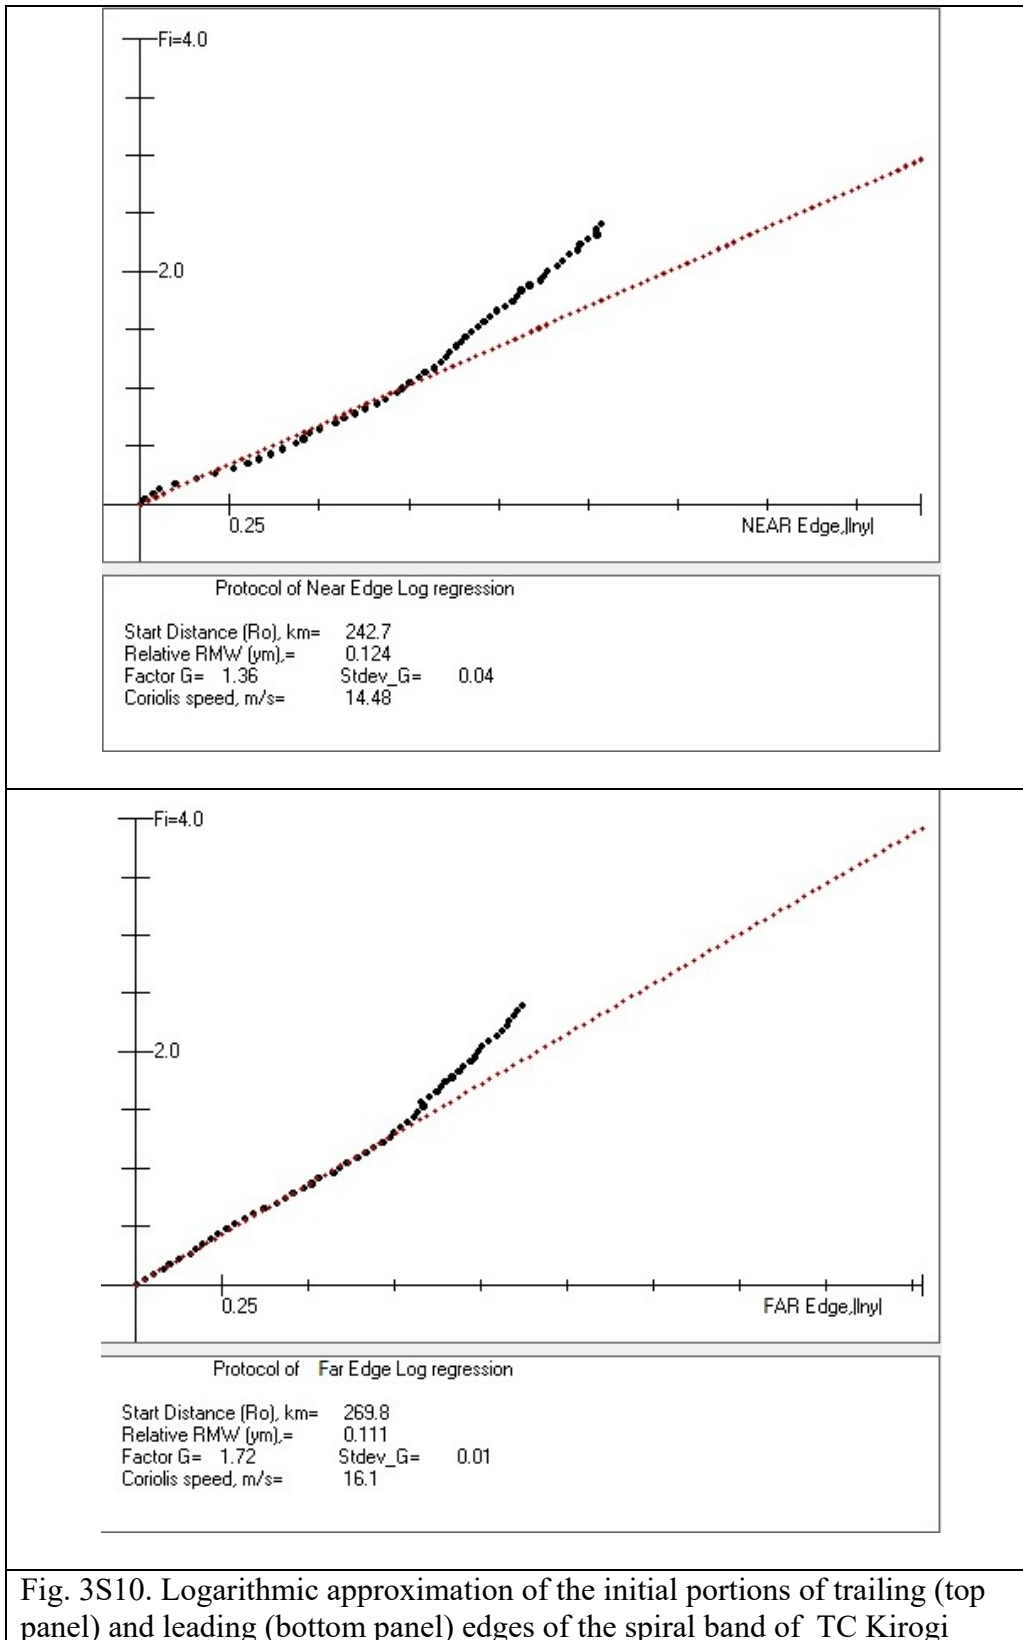

Fig. 3S10. Logarithmic approximation of the initial portions of trailing (top panel) and leading (bottom panel) edges of the spiral band of TC Kirogi

## Supplemental file 11 Mawar

SAR Image index: 20050822203846

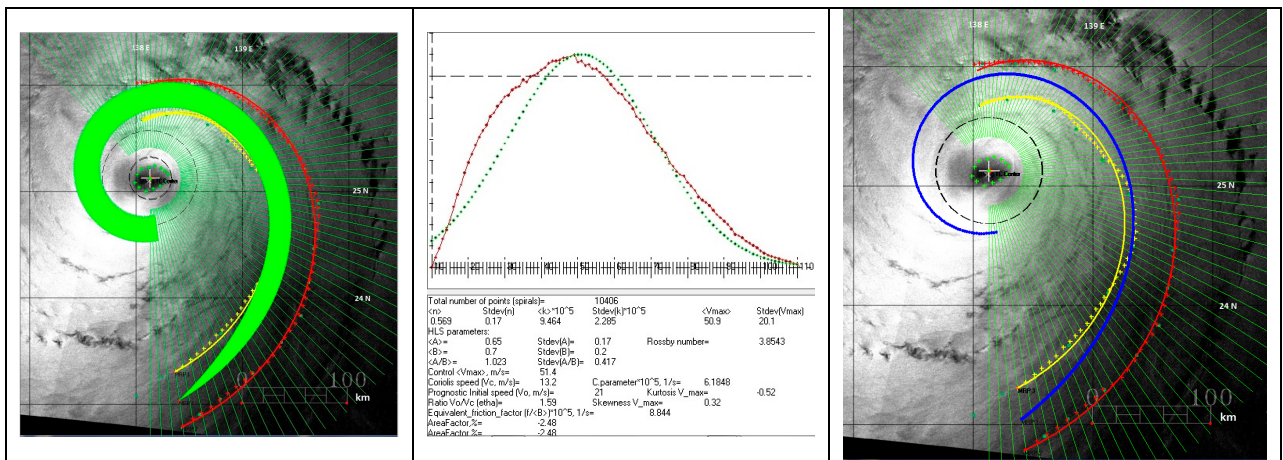

Fig. 1S11. HLS-approximation of spiral band of TC Mawar at  $R_m=45$  km and  $V_m$  range=10-110 m/s; left panel: family of signature HLS; center panel: histogram of  $V_m$ ; right panel: mean HLS of the spiral band (blue curve), the trailing (yellow curve) and leading (red curve) edges approximated by a logarithmic spiral

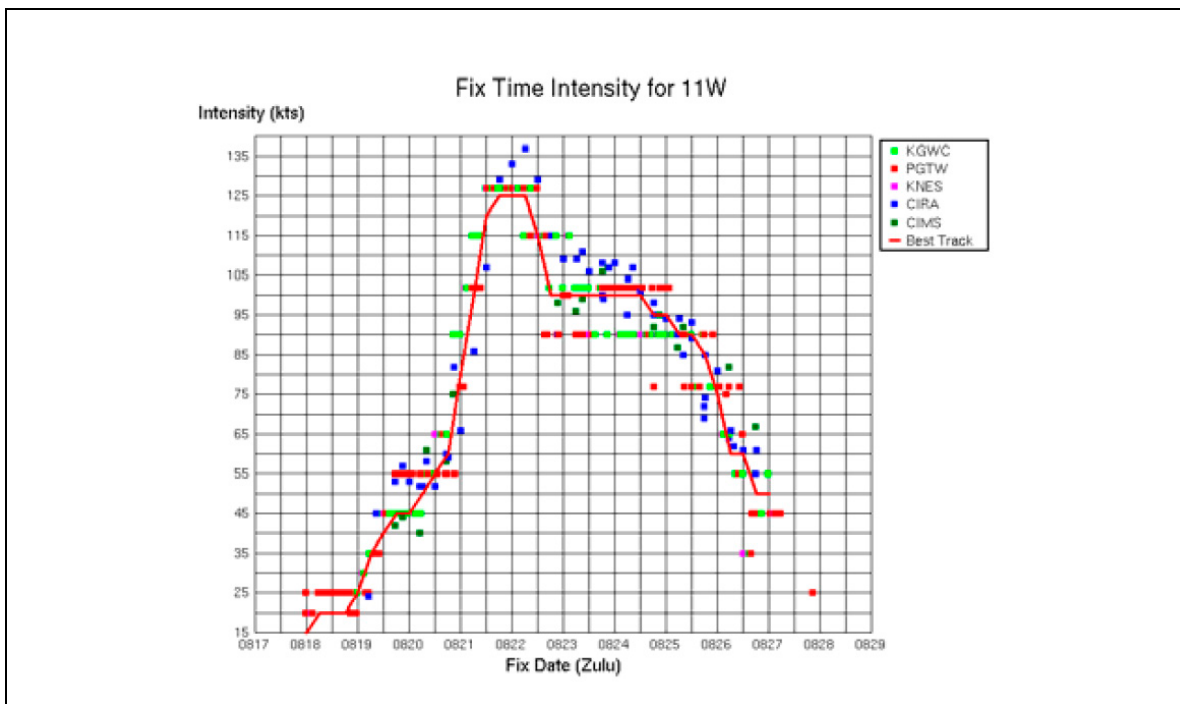

Fig. 2S11. Best Tack data for TC Mawar

Source: Atangan J.F., Preble A. 2005 Annual Tropical Cyclone Report. Super Typhoon 11W (Mawar) 18-27 August 2005. U.S. Naval Maritime Forecast Center/ Joint Typhoon Warning Center. Pearl Harbor, Hawaii, pp. 109, p.28.

<https://www.metoc.navy.mil/jtwc/products/atcr/2005atcr.pdf>

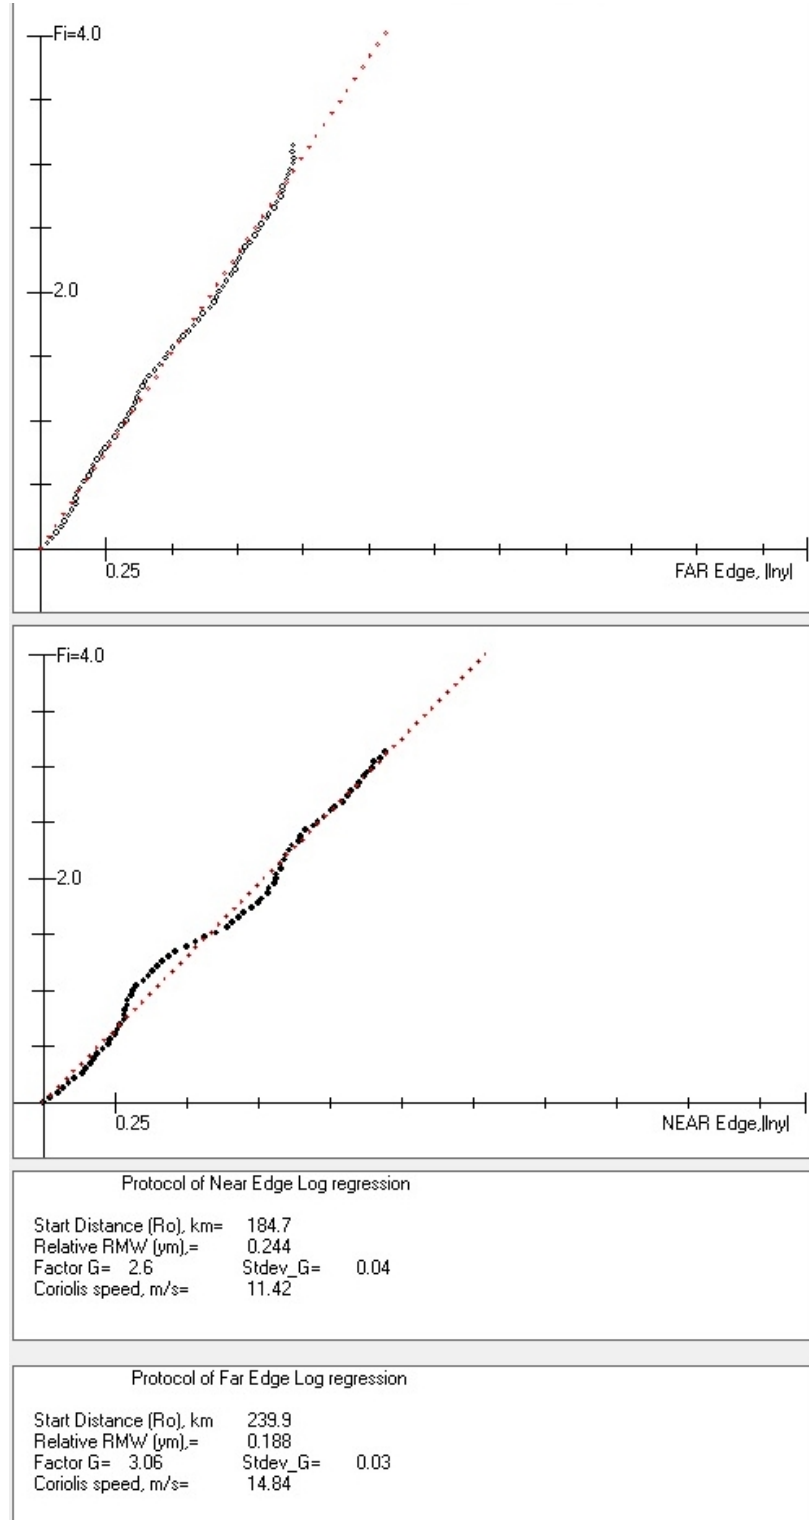

Fig. 3S11. Logarithmic approximation of the leading (top panel) and trailing (bottom panel) edges of the spiral band of TC Mawar

## Supplemental file 12\_Meari

SAR Image index: 20040928092545

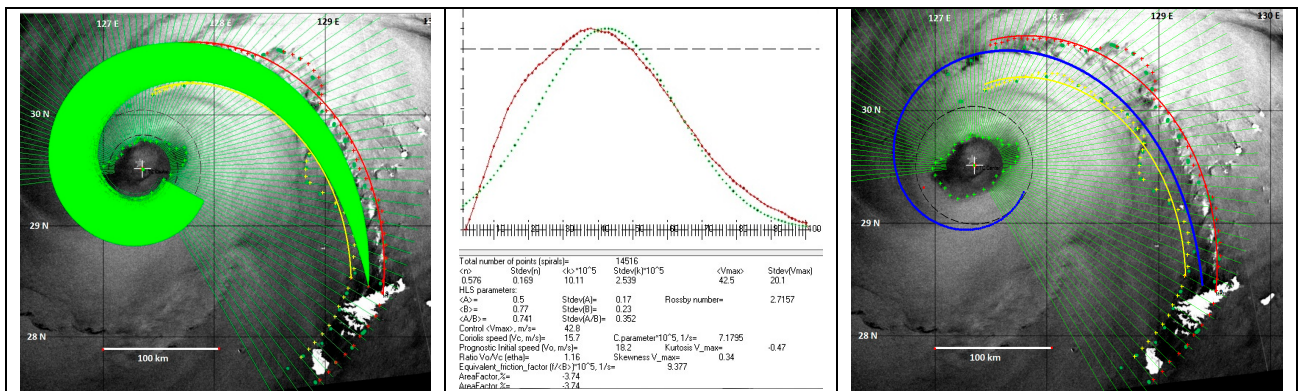

Figure 1S12. HLS-approximation of spiral band of TC Meari at  $R_m=50$  km and  $V_m$  range=1-100 m/s; left panel: family of signature HLS; center panel: histogram of  $V_m$ ; right panel: mean HLS of the spiral band (blue curve). Approximation interval= 9-54 points. The trailing (yellow curve) and leading (red curve) edges approximated by a logarithmic spiral

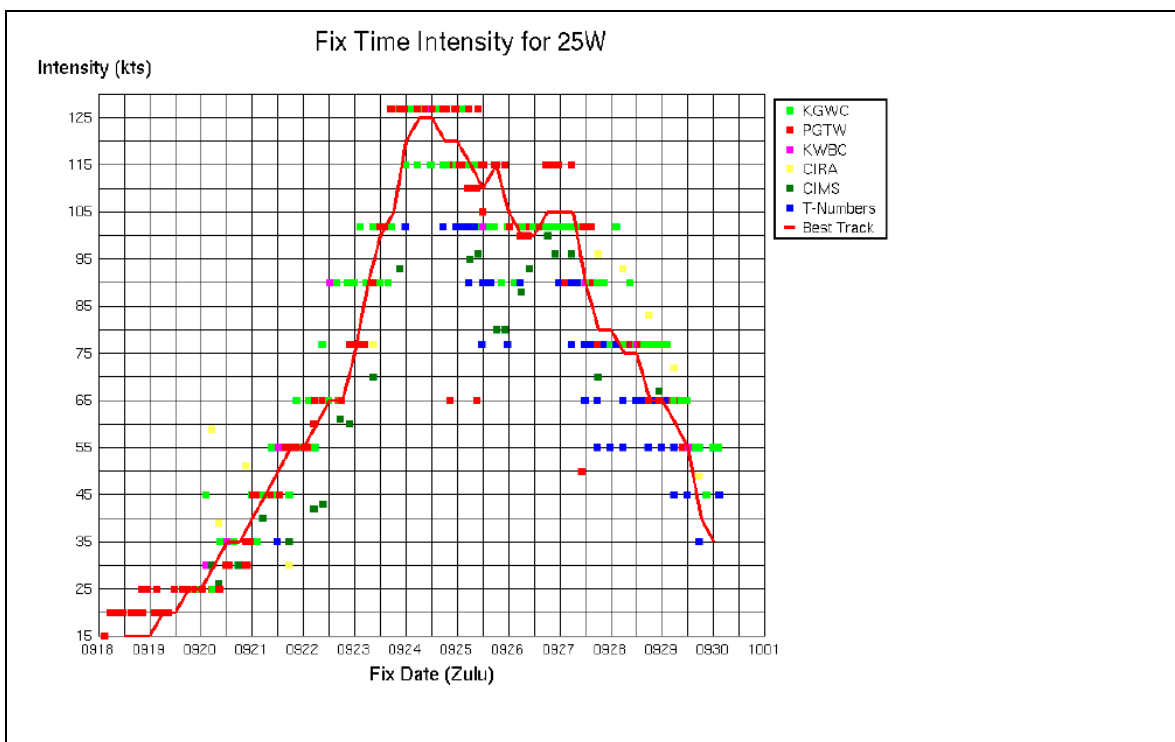

Fig. 2S12. Best Tack data for TC Meari

Source: Atangan J.F., Preble A. 2004 Annual Tropical Cyclone Report. Typhoon 25W (Meari) 20-29 Sep 2004. U.S. Naval Maritime Forecast Center/ Joint Typhoon Warning Center. Pear Harbor, Hawaii, pp. 327, p.138.

<https://www.metoc.navy.mil/jtwc/products/atcr/2004atcr.pdf>

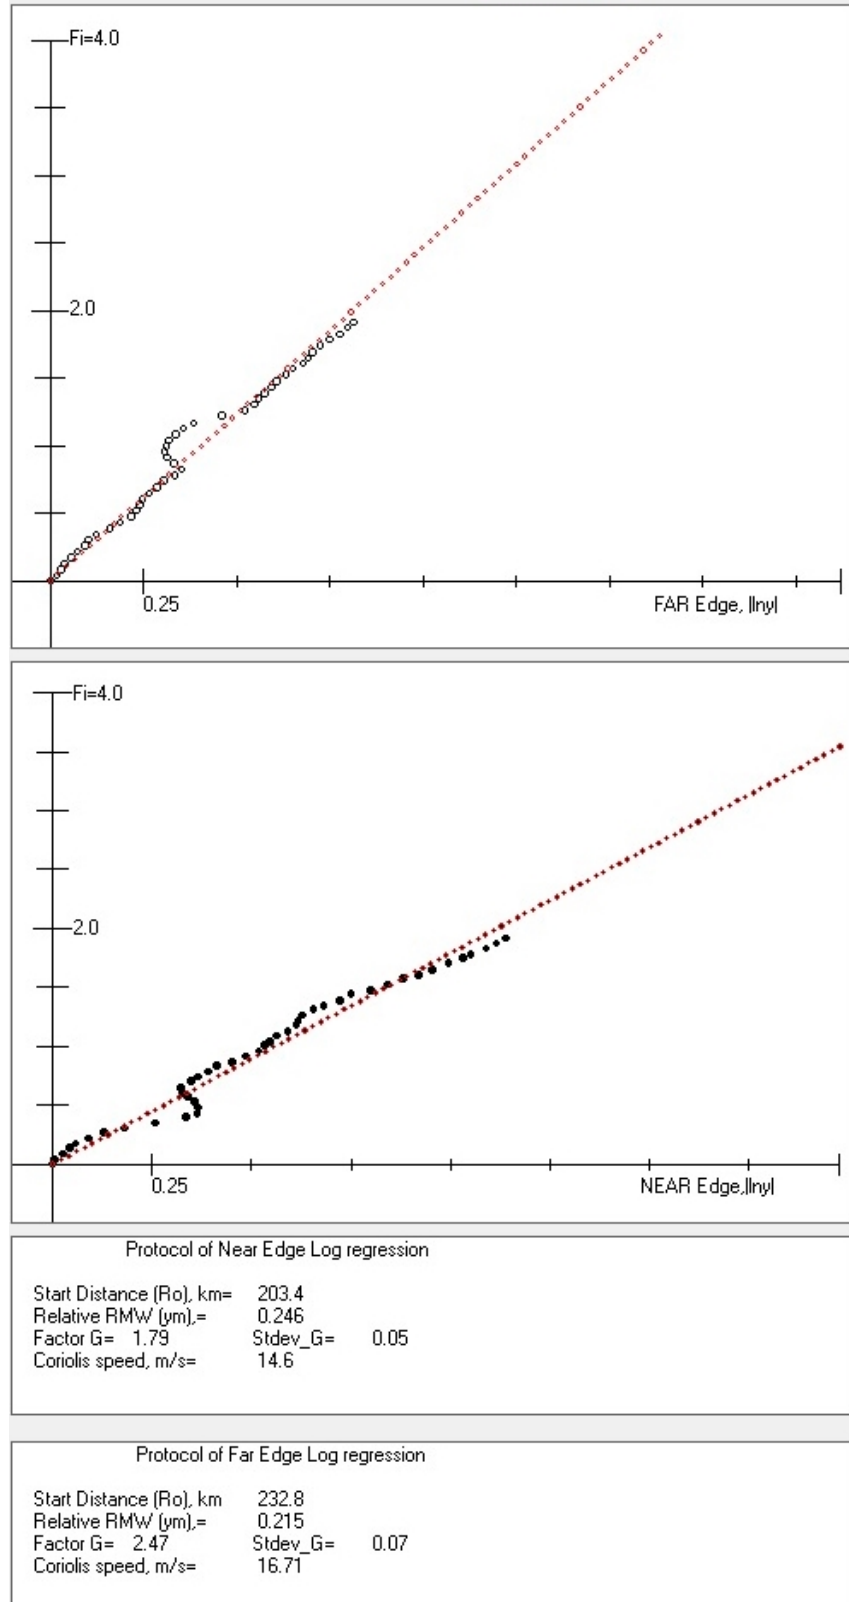

Fig. 3S12. Logarithmic approximation of the of leading (top panel) and trailing (bottom panel) edges of the spiral band of TC Meari

## Supplemental file 13\_Xangsane

SAR Image index: 20060930223832

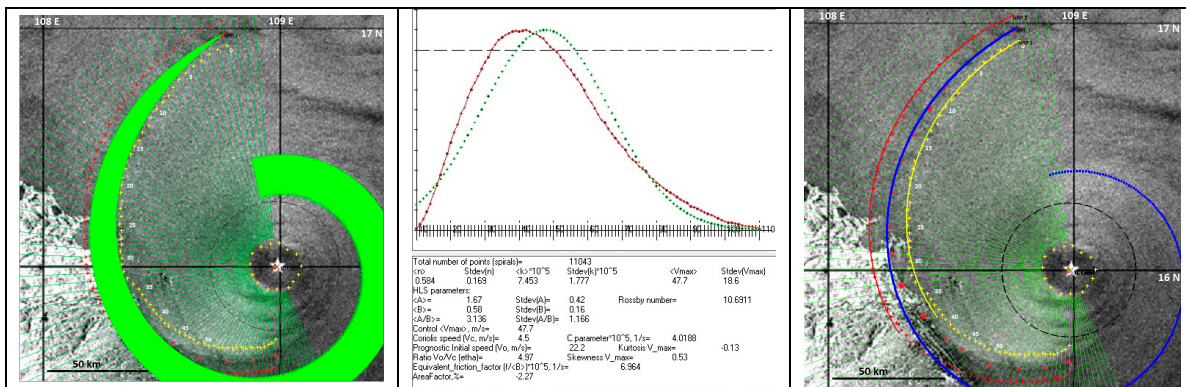

Figure 1S13. HLS-approximation of spiral band of TC Xangsane at  $R_m=30$  km and  $V_m$  range=10-110 m/s; left panel: family of signature HLS; center panel: histogram of  $V_m$ ; right panel: mean HLS of the spiral band (blue curve). Approximation interval= 0-40 points. The trailing (yellow curve) and leading (red curve) edges approximated by a logarithmic spiral

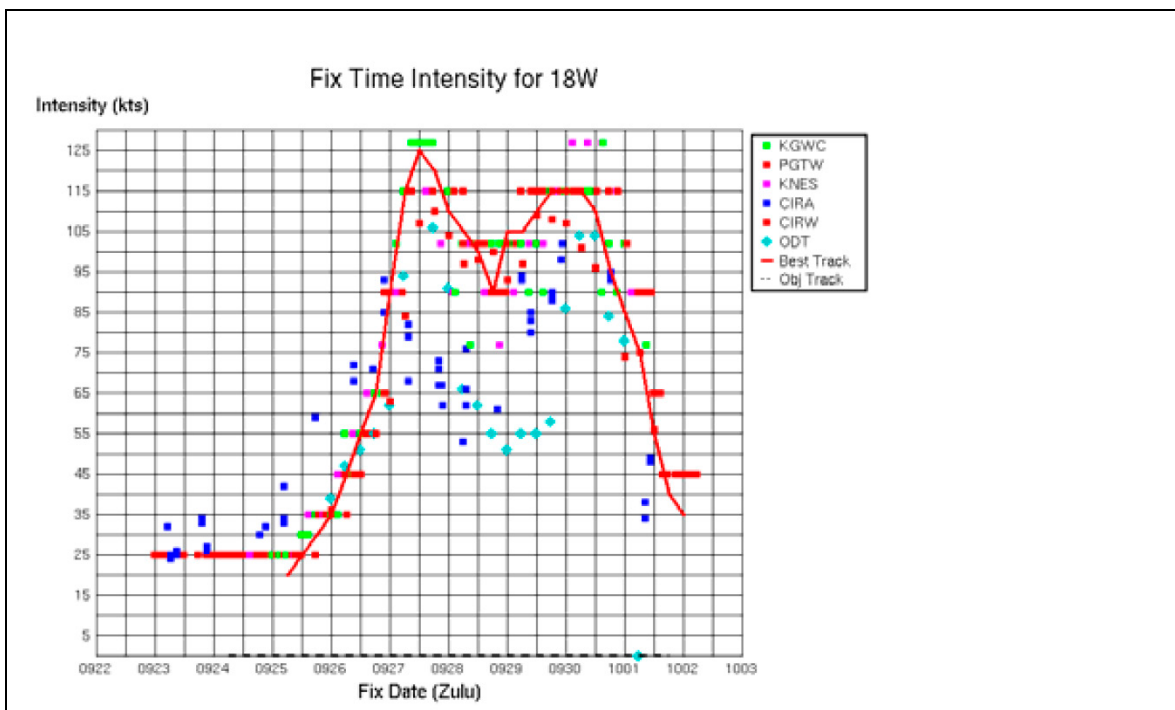

Fig. 2S13. Best Tack data for TC Xangsane

Source: O'Hara J.F., Falvey R. 2006 Annual Tropical Cyclone Report. Typhoon 18W (Xangsane) 25 September-02 October 2006. U.S. Naval Maritime Forecast Center/ Joint Typhoon Warning Center. Pearl Harbor, Hawaii, pp. 98, p.19.  
<https://www.metoc.navy.mil/jtwc/products/atcr/2006atcr.pdf>.

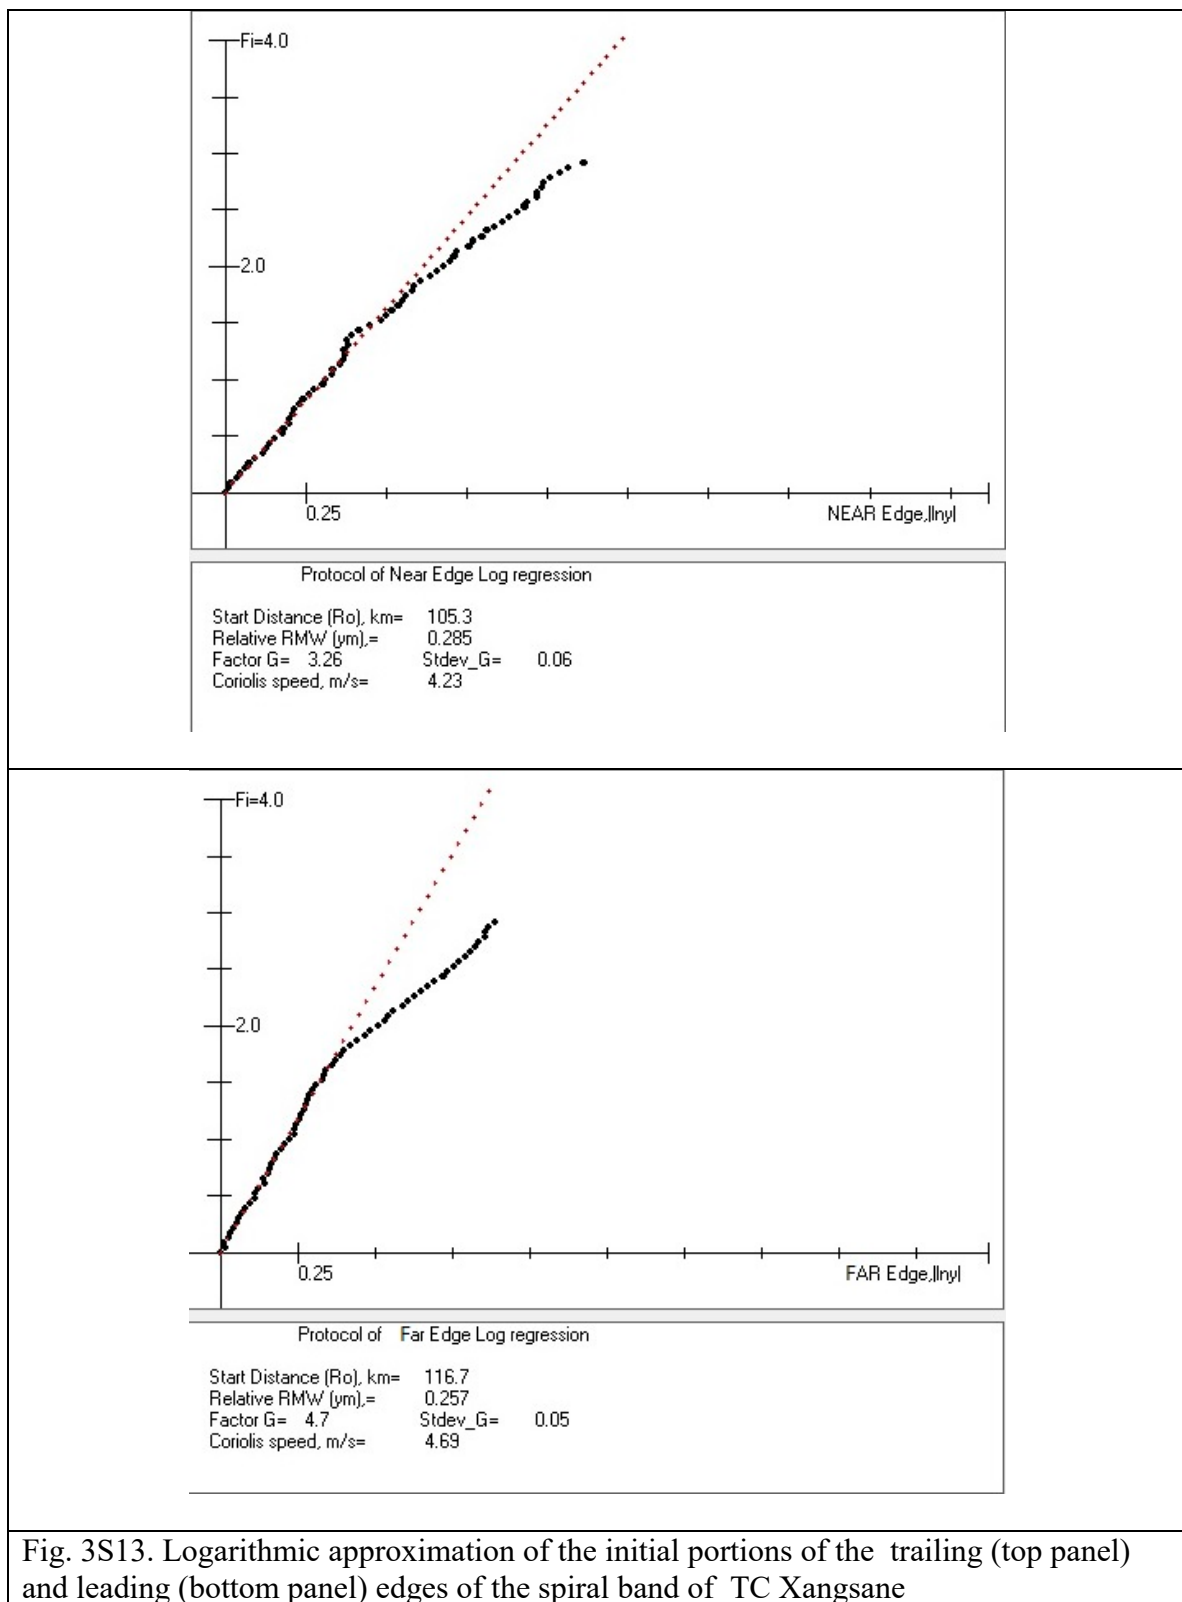

## Supplemental file 14\_Yagi

SAR Image index: 20060921201753

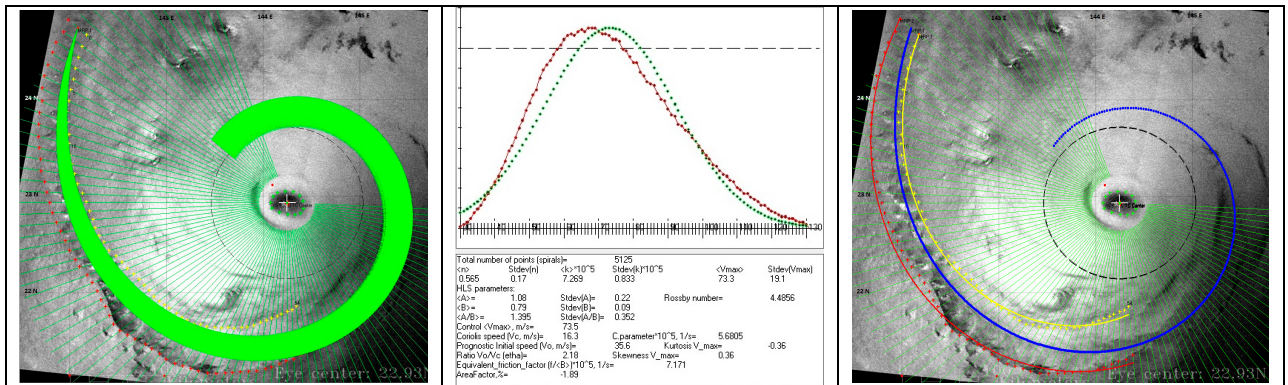

Fig. 1S14. HLS-approximation of spiral band of TC Yagi at  $R_m=80$  km and  $V_m$  range=30-130 m/s; left panel: family of signature HLS; center panel: histogram of  $V_m$ ; right panel: mean HLS of the spiral band (blue curve), trailing (yellow curve) and leading (red curve) edges approximated by a logarithmic spiral

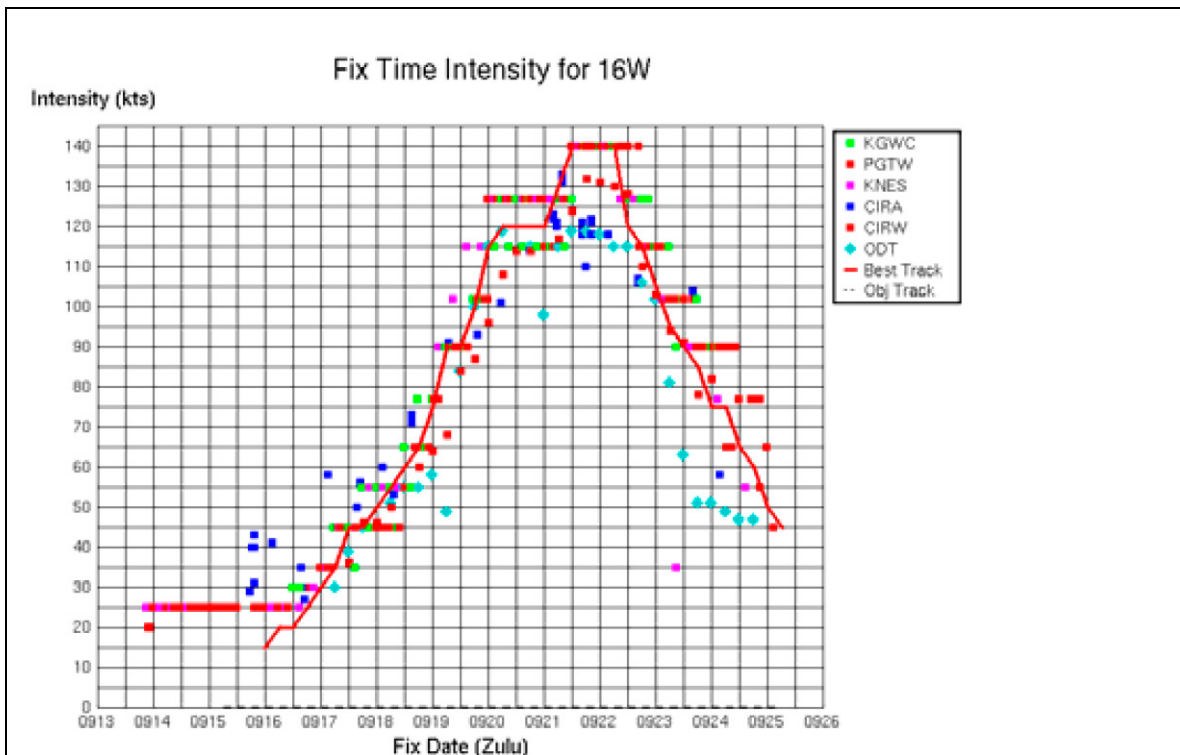

Fig. 2S14. Best Track data for TC Yagi

Source: O'Hara J.F., Falvey R. 2006 Annual Tropical Cyclone Report. Super Typhoon 16W (Yagi) 16-25 September 2006. U.S. Naval Maritime Forecast Center/ Joint Typhoon Warning Center. Pearl Harbor, Hawaii, pp. 98, p.31.

<https://www.metoc.navy.mil/jtwc/products/atcr/2006atcr.pdf>.

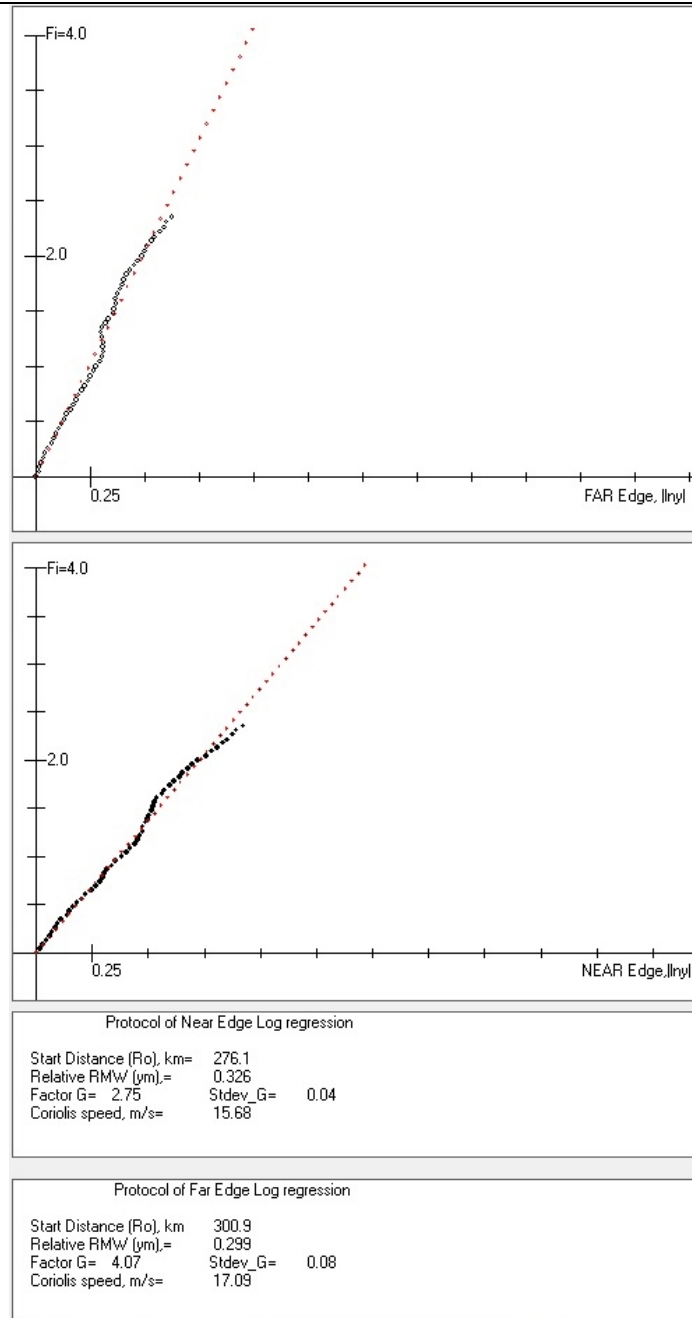

Fig. 3S14. Logarithmic approximation of the leading (top panel) and trailing (bottom panel) edges of the spiral band of TC Xangsane
